# Supplementary material for: Multiparametric MRI followed by targeted prostate biopsy for men with suspected prostate cancer: a clinical decision analysis
Source: PubMed Central journal article supplement (PMC4067835; doi:10.1136/bmjopen-2014-004895), 2014-06-14
Supplement: bmjopen-2014-004895.draft_revisions.pdf [file bmjopen-2014-004895.draft_revisions.pdf]

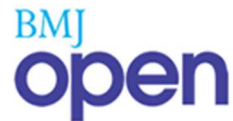

**Multi-parametric MRI followed by targeted prostate biopsy  
for men with suspected prostate cancer: a clinical decision  
analysis**

|                                 |                                                                                                                                                                                                                                                                                                                                                                                                                                                                                                                                                                                                                                                                                         |
|---------------------------------|-----------------------------------------------------------------------------------------------------------------------------------------------------------------------------------------------------------------------------------------------------------------------------------------------------------------------------------------------------------------------------------------------------------------------------------------------------------------------------------------------------------------------------------------------------------------------------------------------------------------------------------------------------------------------------------------|
| Journal:                        | <i>BMJ Open</i>                                                                                                                                                                                                                                                                                                                                                                                                                                                                                                                                                                                                                                                                         |
| Manuscript ID:                  | bmjopen-2014-004895                                                                                                                                                                                                                                                                                                                                                                                                                                                                                                                                                                                                                                                                     |
| Article Type:                   | Research                                                                                                                                                                                                                                                                                                                                                                                                                                                                                                                                                                                                                                                                                |
| Date Submitted by the Author:   | 20-Jan-2014                                                                                                                                                                                                                                                                                                                                                                                                                                                                                                                                                                                                                                                                             |
| Complete List of Authors:       | Willis, Sarah; London School of Hygiene & Tropical Medicine, Department of Health Services Research & Policy<br>Ahmed, Hashim; Division of Surgery and Interventional Sciences, University College London<br>Moore, Caroline; University College London, Division of Surgery and Interventional Sciences<br>Donaldson, Ian; University College London, Division of Surgery and Interventional Sciences<br>Emberton, Mark; UCLH NHS FT, Urology<br>Miners, Alec; London School of Hygiene and Tropical Medicine, Department of Health Services Research & Policy<br>van der Meulen, Jan; London School of Hygiene and Tropical Medicine, Department of Health Services Research & Policy |
| <b>Primary Subject Heading</b>: | Diagnostics                                                                                                                                                                                                                                                                                                                                                                                                                                                                                                                                                                                                                                                                             |
| Secondary Subject Heading:      | Health economics                                                                                                                                                                                                                                                                                                                                                                                                                                                                                                                                                                                                                                                                        |
| Keywords:                       | biopsy, diagnosis, decision trees, Magnetic resonance imaging < RADIOLOGY & IMAGING, prostatic neoplasms                                                                                                                                                                                                                                                                                                                                                                                                                                                                                                                                                                                |
|                                 |                                                                                                                                                                                                                                                                                                                                                                                                                                                                                                                                                                                                                                                                                         |

SCHOLARONE™  
Manuscripts

1  
2  
3 **Multi-parametric MRI followed by targeted prostate biopsy for men with suspected**  
4  
5 **prostate cancer: a clinical decision analysis**  
6

7 Sarah R Willis, Hashim U Ahmed, Caroline M Moore, Ian Donaldson, Mark Emberton, Alec H  
8

9 Miners, Jan van der Meulen  
10

11  
12  
13  
14  
15 Department of Health Services Research & Policy, London School of Hygiene & Tropical  
16

17 Medicine, 15-17 Tavistock Place, London, WC1H 9SH.  
18

19 Sarah R Willis, Research Fellow  
20

21 Alec H Miners, Senior Lecturer  
22

23 Jan van der Meulen, Professor of Clinical Epidemiology  
24  
25  
26  
27  
28

29 Division of Surgery and Interventional Sciences, University College London, London UK and  
30

31 Department of Urology, University College London Hospitals NHS Foundation Trust, London  
32

33 Hashim U Ahmed, MRC Clinician Scientist  
34

35 Caroline M Moore, Consultant Urologist  
36  
37

38 Ian Donaldson, Clinical Research Fellow  
39

40 Mark Emberton, Director  
41  
42  
43  
44

45 Correspondence to: S Willis [sarah.willis@lshtm.ac.uk](mailto:sarah.willis@lshtm.ac.uk)  
46  
47

48 **Keywords:** biopsy; diagnosis; decision trees; magnetic resonance imaging; prostatic  
49

50 neoplasms  
51

52 **Word count of abstract:** 226  
53

54 **Word count of text:** 2,452  
55  
56  
57  
58  
59  
60

1  
2  
3  
4  
5 The Corresponding Author, Ms Sarah Willis, has the right to grant on behalf of all authors  
6 and does grant on behalf of all authors, an exclusive licence (or non exclusive for  
7  
8 government employees) on a worldwide basis to the BMJ Publishing Group Ltd to permit  
9  
10 this article (if accepted) to be published in BMJ editions and any other BMJ PGL products and  
11  
12 sublicences such use and exploit all subsidiary rights, as set out in our licence.  
13  
14  
15  
16  
17  
18  
19  
20  
21  
22  
23  
24  
25  
26  
27  
28  
29  
30  
31  
32  
33  
34  
35  
36  
37  
38  
39  
40  
41  
42  
43  
44  
45  
46  
47  
48  
49  
50  
51  
52  
53  
54  
55  
56  
57  
58  
59  
60

**ABSTRACT (226 words)**

**Objective:** To compare the diagnostic outcomes of the current approach of TRUS-guided biopsy in men with suspected prostate cancer to an alternative approach using multiparametric MRI (mpMRI), followed by MRI-targeted biopsy if positive.

**Design:** Clinical decision analysis was used to synthesise data from recently emerging evidence in a format that is relevant for clinical decision making.

**Population:** A hypothetical cohort of 1000 men with suspected prostate cancer.

**Interventions:** mpMRI and if positive MRI-targeted biopsy compared to TRUS-guided biopsy in all men.

**Outcome measures:** We report the number of men expected to undergo a biopsy as well as the numbers of correctly identified patients with or without prostate cancer. A probabilistic sensitivity analysis was carried out using Monte Carlo simulation to explore the impact of statistical uncertainty in the diagnostic parameters.

**Results:** In 1000 men, mpMRI followed by MRI-targeted biopsy “dominates” TRUS-guided biopsy as it results in fewer expected biopsies (600 versus 1000), more men being correctly identified as having clinically significant cancer (320 versus 250), and fewer men being falsely identified (20 versus 50). The mpMRI-based strategy dominated TRUS-guided biopsy in 90% of the simulations of the sensitivity analysis.

**Conclusions:** Our analysis demonstrates that mpMRI followed by MRI-targeted biopsy is likely to result in fewer and better biopsies than TRUS-guided biopsy. Future research in prostate cancer should focus on providing precise estimates of key diagnostic parameters.

**STRENGTHS AND LIMITATIONS OF THE STUDY (127 words)**

- There are no clinical studies that directly compare the standard diagnostic approach using TRUS biopsy in all men with suspected prostate cancer with an approach where mpMRI is used to select men for biopsy and to guide the biopsy needle towards a suspicious lesion.
- Our decision analysis brings together emerging evidence on the diagnostic accuracy of TRUS biopsy, mpMRI and MRI-targeted biopsies.
- A probabilistic sensitivity analysis demonstrates that the MRI strategy was most effective in 90% of the simulations. However this sensitivity analysis did not assess the impact of structural uncertainties.
- This analysis focuses purely on short term clinical outcomes following different testing options. Ultimately, the optimal diagnostic strategy for men with suspected prostate cancer will depend on the impact of both costs and quality-adjusted life expectancy.

## INTRODUCTION

Prostate cancer is the most common male cancer in most developed countries. Incidence rates have risen rapidly over the past 15 years, in part due to the increase in prostate specific antigen (PSA) testing. PSA testing remains controversial since it does not necessarily indicate prostate cancer and many men diagnosed with prostate cancer will not die from the disease. It is increasingly accepted that a distinction should be made between prostate cancer that is unlikely to cause harm ("clinically insignificant" disease) and cancer which, if untreated, may cause symptoms or lead to death ("clinically significant" disease). Although there is no consensus on what constitutes clinically significant disease, it is usually described in terms of cancer volume and the extent of cell differentiation (cancer grade) [1-3].

The optimal strategy for diagnosing clinically significant prostate cancer is the focus of a rapidly developing body of research. The standard diagnostic approach for men with suspected prostate cancer is to offer them a transrectal ultrasound (TRUS)-guided prostate biopsy taking 10 to 12 cores [4-6]. The ultrasound guidance ensures the biopsy needles are guided to zones within the gland, but generally not to a suspicious lesion that is more likely to contain cancer. Imaging the prostate of all men before biopsy has been proposed, but it remains controversial in some centres partly due to doubts about the performance and reproducibility of multi-parametric MRI (mpMRI). This alternative diagnostic pathway, already being implemented by some NHS providers, would require all men with raised PSA to have an mpMRI but only those with a suspicious lesion to undergo an MRI-targeted biopsy. Men who are negative on mpMRI would receive no further investigation. During

1  
2  
3 MRI-targeted biopsy, the biopsy needle is either directed by the clinician's interpretation of  
4  
5 the mpMRI results ("cognitive registration") or by using computing technology that digitally  
6  
7 overlays the target information derived from the mpMRI directly onto the ultrasound image  
8  
9 ("computer-aided registration"). Irrespective of the image-registration technique, an MRI-  
10  
11 based approach to diagnosis has two potential advantages: patients with no lesion on  
12  
13 mpMRI would avoid a prostate biopsy and using mpMRI for targeting may improve the  
14  
15 detection of clinically significant cancers.  
16  
17  
18  
19  
20

21  
22 We summarise what can be understood from recently emerging evidence in a format that is  
23  
24 relevant for clinical decision making. We carried out a decision analysis to compare a  
25  
26 simplified version of the current standard diagnostic approach (TRUS-guided biopsy) with an  
27  
28 approach where mpMRI is used to select men for biopsy and to guide the biopsy needle  
29  
30 towards the area of suspected cancer. We estimate the number of biopsies that could be  
31  
32 avoided with pre-biopsy mpMRI and the number of correctly identified patients with and  
33  
34 without clinically significant prostate cancer.  
35  
36  
37  
38  
39  
40  
41  
42  
43  
44  
45  
46  
47  
48  
49  
50  
51  
52  
53  
54  
55  
56  
57  
58  
59  
60

## METHODS

### *Decision analysis*

We used a decision tree to compare the standard diagnostic pathway (TRUS-guided biopsy for all) with a new pathway (mpMRI for all, then MRI-targeted biopsy if positive). The tree, presented in Figure 1, was evaluated to reveal the expected outcomes associated with each option, for a hypothetical cohort of 1000 men. The probability estimates used to populate the decision tree were derived from recent studies which reported data that reflected the conditional nature of the parameters and used an appropriate reference test [7-9]. All of these data are limited in some way, but assumptions were made so that any biases would favour the current diagnostic approach.

### *Target population*

The target population for the decision analysis was men with increased serum PSA levels or abnormal findings on digital rectal examination who had never had a prostate biopsy.

### *Clinically significant disease*

For our base-case analysis we defined clinically significant disease according to widely used, and arguably somewhat conservative, criteria: a minimum volume of 0.2cc or cell differentiation corresponding to a Gleason score of 3+4 or higher [10]. The prevalence of clinically significant disease in our target population is uncertain, but we estimated it to be 50% of all men with suspected prostate cancer, based on a prospective analysis of men



1  
2  
3 undergoing a first prostate biopsy [11]. We varied the prevalence of clinically significant  
4  
5 disease in a sensitivity analysis.  
6  
7

### 8 9 10 *TRUS-guided biopsy*

11  
12 The gold standard used to establish the presence or absence of clinically significant disease -  
13  
14 whole-mount pathological data - is usually only available for men who test positive and then  
15  
16 go on to have radical surgery [7 8 12]. Therefore we used data from a study which carried  
17  
18 out computer simulations to estimate the performance characteristics of TRUS-guided  
19  
20 biopsy by comparing them to reconstructed whole-mount pathology obtained from patients  
21  
22 undergoing surgery for bladder cancer, which revealed they also had prostate cancer [13].  
23  
24

25  
26 The spectrum of disease in this sample population is likely to include more early-stage  
27  
28 disease than would be expected in an unscreened UK population, and thus this bias will  
29  
30 favour the current diagnostic approach.  
31  
32

33  
34  
35  
36 The sensitivity of TRUS-guided biopsy, when criteria proposed by Epstein were used to  
37  
38 interpret the diagnostic result, was approximately 50%[13]. According to Epstein, a biopsy  
39  
40 result is positive for significant cancer if the maximum cancer core length from biopsy is at  
41  
42 least 3mm or if the Gleason score is 3+4 or higher[10]. The corresponding specificity of  
43  
44 TRUS-guided biopsy was estimated to be approximately 90%, which represents the  
45  
46 proportion of men correctly identified with insignificant disease (men with no prostate  
47  
48 cancer were not included in the study population).  
49  
50  
51  
52  
53  
54  
55  
56  
57  
58  
59  
60

*mpMRI and MRI-targeted biopsy*

We estimated the diagnostic accuracy of the MRI-based strategy by combining the estimates for mpMRI and MRI-targeted biopsy. A recent systematic review of the literature revealed two studies on MRI in biopsy-naïve men with suspected prostate cancer [8 14 15]. The accuracy of mpMRI could only be estimated from data reported in one of these publications: a large study involving 555 men which compared pre-biopsy mpMRI results with TRUS-guided biopsy and/or MRI-targeted biopsy as a proxy for true disease status[14]. We used these data to estimate the sensitivity of mpMRI at 80% and the specificity 60%. A more recent study shows these values may in fact underestimate the performance of mpMRI[16].

The accuracy of MRI-targeted biopsy was taken from a study that compared MRI-targeted biopsy with cognitive registration to 20-sector template-prostate mapping [17]. This study was used since all men in the study population had a lesion on mpMRI and therefore allowed us to capture the sequential nature of the diagnostic approach. The study showed that when the biopsies were classified according to the Epstein criteria, the sensitivity was approximately 80% and the specificity 80%[17]. The specificity that this study reported for the MRI-targeted biopsy is lower than our estimate of the 90% specificity of TRUS-guided biopsy. However, the use of MRI-targeting instead of TRUS-guided biopsy should have no impact on men without clinically significant disease, and therefore we assumed that MRI-targeted biopsy should be as good as – but not better than – TRUS-guided biopsy at correctly identifying men without clinically significant prostate cancer. We therefore

1  
2  
3 assumed that the specificity of the MRI-targeted biopsy is 90%, the same as that of TRUS-  
4  
5 guided biopsy.  
6  
7

### 8 9 10 *Sensitivity Analysis*

11  
12 We carried out a one-way sensitivity analysis by varying the prevalence of clinically  
13  
14 significant disease from 0 to 1, keeping all other variables constant. This sensitivity analysis  
15  
16 was intended to demonstrate the extent to which the optimal diagnostic strategy depends  
17  
18 on the prevalence of clinically significant disease.  
19  
20

21  
22  
23  
24 The estimates used to describe the performance of the diagnostic tests in our decision  
25  
26 analysis are uncertain. To assess the robustness of our results, we carried out a probabilistic  
27  
28 sensitivity analysis using Monte Carlo simulation varying the sensitivities and specificities of  
29  
30 the three tests (TRUS-guided biopsy, mpMRI, and MRI-targeted biopsy) simultaneously over  
31  
32 2000 iterations, sampling from beta distributions to characterise the uncertainty in the test  
33  
34 accuracy data [13 14 17]. We determined the beta distributions by assuming that the  
35  
36 sensitivities and specificities were observed in populations consisting of 50 men with and 50  
37  
38 men without clinically significant disease. We substantially widened the distributions (by  
39  
40 assuming a small population of men) in order to increase the uncertainty associated with  
41  
42 the test performance parameters. We ignored the correlation between sensitivity and  
43  
44 specificity and kept the disease prevalence constant at 50%.  
45  
46  
47  
48  
49  
50  
51  
52  
53  
54  
55  
56  
57  
58  
59  
60

## RESULTS

The decision tree demonstrated that the use of TRUS-guided biopsy in a hypothetical cohort of 1000 men with suspected prostate cancer would result in 300 positive and 700 negative biopsy results, which would correctly identify 250 men with clinically significant prostate cancer and 450 men without the disease (Table 2).

The use of mpMRI and MRI-targeted biopsy in the same cohort would result in 600 men undergoing a biopsy with 340 positive and 260 negative biopsy results (Table 2). This diagnostic strategy would correctly identify 320 men as having significant prostate cancer and 480 without the disease.

Multi-parametric MRI followed by MRI-targeted biopsy can therefore be said to clinically dominate TRUS-guided biopsy as it results in fewer expected biopsies (600 versus 1000), more men being correctly identified as having clinically significant disease (320 versus 250), and fewer men being falsely identified with the disease (20 versus 50).

Figure 2 provides a visual representation of the one-way sensitivity analysis showing the total number of people receiving the wrong diagnosis (the sum of the number of patients with a false-positive or a false-negative result) as a function of the prevalence of clinically significant disease. The MRI-based approach resulted in a lower number of patients wrongly diagnosed than with TRUS-guided biopsy for all men, at all prevalence rates. Below a

1  
2  
3 prevalence of 5%, doing nothing is the “optimal” strategy as it leads to the lowest number of  
4  
5 men with the wrong diagnosis. Above a prevalence of 70%, treating all men is optimal.  
6  
7  
8  
9

10 When the sensitivities and specificities of the three tests were varied simultaneously in 2000  
11  
12 simulations for the probabilistic sensitivity analysis, the diagnostic approach using mpMRI  
13  
14 and MRI-targeted biopsy clinically dominated in 90% of the simulations, whereas TRUS-  
15  
16 guided biopsy dominated in 0.4% of the simulations. The remaining 9.6% of simulations  
17  
18 reveal a trade-off between correctly identifying more men with clinically significant cancer  
19  
20 and correctly identifying more men without significant disease.  
21  
22  
23  
24  
25  
26  
27  
28  
29  
30  
31  
32  
33  
34  
35  
36  
37  
38  
39  
40  
41  
42  
43  
44  
45  
46  
47  
48  
49  
50  
51  
52  
53  
54  
55  
56  
57  
58  
59  
60

## DISCUSSION

Our decision analysis revealed that mpMRI of the prostate followed by MRI-targeted biopsy if positive would result in fewer and better biopsies than a strategy using only TRUS-guided biopsy. Indeed, the results show that this MRI-based strategy would reduce the number of biopsies by about one third (600 compared to 1000 biopsies), increase the number of men identified with clinically significant cancer by about 30% (320 compared to 250 patients), and reduce the number of men falsely identified with the disease by 60% (20 compared to 50).

When we accounted for uncertainty in the sensitivity and specificity estimates of the three diagnostic tests, we found that the dominance of the MRI strategy was robust. However, the probabilistic sensitivity analysis did not assess the impact of the inherent “structural” uncertainties. For example, the ongoing debate about the definition of clinically significant cancer, varying diagnostic thresholds used to decide whether mpMRI or biopsy results are positive or negative, and the use of imperfect gold-standard tests.

The National Institute for Health and Care Excellence (NICE), has recently updated its guidance on the diagnosis of prostate cancer patients[7]. Our estimate of the sensitivity of 50% for TRUS-guided biopsy is close to the estimate of 45% used in its analysis. However, we estimated the specificity of the TRUS-guided biopsy to be 90%, whilst NICE assumed it to be 100% [7]. While both of these specificity estimates are somewhat speculative, we felt that the specificity estimate needs to reflect that patients who have clinically insignificant

1  
2  
3 prostate cancer may have biopsy results that are interpreted as suggestive of clinically  
4  
5 significant cancer. We also assumed that this “error” is as likely with TRUS-guided as with  
6  
7 MRI-targeted biopsies and therefore we used the same false-positive rate for TRUS-guided  
8  
9 and for MRI-targeted biopsies. These choices were made deliberately in order to  
10  
11 underestimate the comparative effectiveness of the proposed diagnostic strategy using  
12  
13 mpMRI.  
14  
15

16  
17  
18  
19 The results of our analysis are based on a simplification of the choices facing urologists in  
20  
21 the diagnosis of prostate cancer. In their evaluation, NICE considered a strategy of mpMRI  
22  
23 and biopsy for all men, including targeted biopsies for all men with a lesion on MRI. This  
24  
25 perhaps highlights the reticence of health care professionals to do ‘less’ rather than ‘more’.  
26  
27 A major challenge therefore will be the implementation of a strategy that requires a  
28  
29 negative diagnostic test result to be followed by no immediate further investigation.  
30  
31  
32  
33

34  
35  
36 In this analysis we focussed purely on short term clinical outcomes following different  
37  
38 testing options. Ultimately however the optimal diagnostic strategy for men with suspected  
39  
40 prostate cancer will depend on the impact of both costs and quality-adjusted life  
41  
42 expectancy. The cost of the diagnostic procedures alone may in fact be about the same for  
43  
44 the two diagnostic strategies. If all men receive an mpMRI (£200 in 2011-12 UK NHS prices)  
45  
46 and 60% of these men also receive a biopsy (£540 in 2011-12 UK NHS prices) the mpMRI-  
47  
48 based strategy will result in an average cost of £524 per man, assuming TRUS-guided biopsy  
49  
50 and MRI-targeted biopsy are equivalent in cost[18]. This compares to £540 per man with  
51  
52 TRUS-guided biopsy. Of course the true costs of the two strategies include the long term  
53  
54  
55  
56  
57  
58  
59  
60

1  
2  
3 costs and consequences of further investigations and treatments which need to be taken  
4  
5 into account in future economic modelling.  
6  
7

8  
9  
10 Despite the complexity of these downstream pathways, estimates of diagnostic  
11  
12 performance and disease prevalence will be key drivers of the clinical and cost effectiveness  
13  
14 of the whole of prostate cancer care. Systematic reviews of the prostate biopsy and imaging  
15  
16 literature have revealed a large number of small studies characterised by poor reporting and  
17  
18 important biases [7-9 12]. In our analysis we only used very recently published studies that  
19  
20 capture the emerging evidence on how well TRUS-guided biopsy, mpMRI and MRI-targeted  
21  
22 biopsy perform and estimate disease prevalence. Future research effort in prostate cancer  
23  
24 need to focus on providing accurate and precise estimates of these parameters. Studies  
25  
26 need to consistently distinguish between significant and insignificant cancer, represent the  
27  
28 sequential nature of diagnostic tests and should adhere to high standards of reporting such  
29  
30 as the START guidelines for MRI[19 20]. Without these studies, it will be hard to accurately  
31  
32 evaluate the role of targeted biopsy or any new strategy for diagnosing prostate cancer.  
33  
34  
35  
36  
37  
38  
39  
40  
41  
42  
43  
44  
45  
46  
47  
48  
49  
50  
51  
52  
53  
54  
55  
56  
57  
58  
59  
60



## CONCLUSIONS

Our analysis demonstrates that mpMRI followed by MRI-targeted biopsy is likely to result in fewer and better biopsies than TRUS-guided biopsy. We found that the MRI-based strategy correctly identified more men with significant prostate cancer and correctly identified more men without the disease in 90% of the simulations in our probabilistic sensitivity analysis. Estimates of disease prevalence and diagnostic performance will be key drivers of a full economic analysis, so research efforts should focus on providing precise estimates of these crucial parameters.

### ACKNOWLEDGEMENTS

The authors would like to thank Yipeng Hu and Veeru Kasivisvanathan for their assistance in providing additional data for the analysis. We also acknowledge the research support Mark Emberton receives from the United Kingdom's National Institute of Health Research UCL/UCLH Biomedical Research Centre, London.

This publication presents independent research commissioned by the Health Innovation Challenge Fund (HICF-T4-310), a parallel funding partnership between the Wellcome Trust and the Department of Health. The views expressed in this publication are those of the authors and not necessarily those of the Wellcome Trust or the Department of Health.

### AUTHOR CONTRIBUTIONS

JvdM, SW, AM, HA, ME made substantial contributions to the conception and design of the work; SW, HA, CM and ID acquired the data; SW, JvdM, HA, CM and ID analysed and interpreted the data; SW and JvdM drafted the work and HA, CM, ID, ME, AM provided critical revision of the manuscript; ME, HA, CM, JvdM, SW and AM obtained funding and JvdM and AM provided supervision. All authors have read and approved the final manuscript and agree to be accountable for all aspects of the work.

### FUNDING

This publication presents independent research commissioned by the Health Innovation Challenge Fund (HICF-T4-310), a parallel funding partnership between the Wellcome Trust and the Department of Health. The views expressed in this publication are those of the authors and not necessarily those of the Wellcome Trust or the Department of Health.

1  
2  
3 All authors have completed the ICMJE uniform disclosure  
4  
5 at [www.icmje.org/coi\\_disclosure.pdf](http://www.icmje.org/coi_disclosure.pdf) and declare: financial support for the submitted work  
6  
7 from the Wellcome Trust and the Department of Health (for all authors); Prof. Mark  
8  
9 Emberton is a consultant/investigator for USHIFU, STEBA Biotech, Sanofi Aventis,  
10  
11 GlaxoSmithKline and Angiodynamics, is a consultant for Sophiris and is a director of  
12  
13 Mediwatch PLC. Mr. Hashim Ahmed is an investigator for USHIFU, Angiodynamics and  
14  
15 Advanced Medical Diagnostics (AMD). Ms. Caroline Moore has received research grants  
16  
17 from GlaxoSmithKline, the Wellcome Trust and Advanced Medical Diagnostics (AMD), is a  
18  
19 consultant/investigator for STEBA Biotech and has been paid for lecturing by Sanofi. Prof.  
20  
21 Jan vanderMeulen, Dr. Alec Miners and Ms. Sarah Willis have no other interests to disclose.  
22  
23  
24  
25  
26  
27  
28

29 Ethical approval was not required for this study. The data inputs and decision tree structure  
30  
31 are explained in full so no additional data is available.  
32  
33  
34  
35  
36  
37  
38  
39  
40  
41  
42  
43  
44  
45  
46  
47  
48  
49  
50  
51  
52  
53  
54  
55  
56  
57  
58  
59  
60

## REFERENCES

1. Ahmed HU, Hu Y, Carter T, et al. Characterizing clinically significant prostate cancer using template prostate mapping biopsy. *J Urol* 2011;**186**(2):458-64 doi: S0022-5347(11)03560-9 [pii]
2. Stamey TA, Freiha FS, McNeal JE, et al. Localized prostate cancer. Relationship of tumor volume to clinical significance for treatment of prostate cancer. *Cancer* 1993;**71**(3 Suppl):933-8
3. Goto Y, Ohori M, Arakawa A, et al. Distinguishing clinically important from unimportant prostate cancers before treatment: value of systematic biopsies. *J Urol* 1996;**156**(3):1059-63
4. Prostate Cancer Risk Management Programme. Undertaking a transrectal ultrasound guided biopsy of the prostate. Secondary Undertaking a transrectal ultrasound guided biopsy of the prostate 2006 2006. [www.cancerscreening.nhs.uk/prostate/pcrmp01.pdf](http://www.cancerscreening.nhs.uk/prostate/pcrmp01.pdf).
5. National Institute for Health and Clinical Excellence. Prostate cancer diagnosis and treatment. NICE clinical guideline 58. London, 2008.
6. Heidenreich A, Bellmunt J, Bolla M, et al. EAU guidelines on prostate cancer. Part 1: screening, diagnosis, and treatment of clinically localised disease. *Eur Urol* 2011;**59**(1):61-71
7. National Institute for Health and Care Excellence. Prostate cancer (update): guideline consultation. London: NICE, 2013.
8. Moore CM, Robertson NL, Arsanious N, et al. Image-guided prostate biopsy using magnetic resonance imaging-derived targets: a systematic review. *Eur Urol* 2013;**63**(1):125-40
9. Mowatt G, Scotland G, Boachie C, et al. The diagnostic accuracy and cost-effectiveness of magnetic resonance spectroscopy and enhanced magnetic resonance imaging techniques in aiding the localisation of prostate abnormalities for biopsy: a systematic review and economic evaluation. *Health Technol Assess* 2013;**17**(20):1-281
10. Epstein JI, Walsh PC, Carmichael M, et al. Pathologic and clinical findings to predict tumor extent of nonpalpable (stage t1c) prostate cancer. *JAMA* 1994;**271**(5):368-74
11. Kuru TH, Roethke MC, Seidenader J, et al. Critical Evaluation of Magnetic Resonance Imaging Targeted, Transrectal Ultrasound Guided Transperineal Fusion Biopsy for Detection of Prostate Cancer. *J Urol* 2013;**190**(4):1380-6 doi:
12. Eichler K, Hempel S, Wilby J, et al. Diagnostic value of systematic biopsy methods in the investigation of prostate cancer: a systematic review. *J Urol* 2006;**175**(5):1605-12

13. Lecornet E, Ahmed HU, Hu Y, et al. The accuracy of different biopsy strategies for the detection of clinically important prostate cancer: a computer simulation. *J Urol* 2012;**188**(3):974-80
14. Haffner J, Lemaitre L, Puech P, et al. Role of magnetic resonance imaging before initial biopsy: comparison of magnetic resonance imaging-targeted and systematic biopsy for significant prostate cancer detection. *BJU Int* 2011;**108**(8 Pt 2):E171-8
15. Park BK, Park JW, Park SY, et al. Prospective evaluation of 3-T MRI performed before initial transrectal ultrasound-guided prostate biopsy in patients with high prostate-specific antigen and no previous biopsy. *AJR American journal of roentgenology* 2011;**197**(5):W876-81
16. Kuru TH, Roethke MC, Seidenader J, et al. Critical Evaluation of Magnetic Resonance Imaging Targeted, Transrectal Ultrasound Guided Transperineal Fusion Biopsy for Detection of Prostate Cancer. *The Journal of Urology* 2013;**190**(4):1380-86
17. Kasivisvanathan V, Dufour R, Moore CM, et al. Transperineal Magnetic Resonance Image Targeted Prostate Biopsy Versus Transperineal Template Prostate Biopsy in the Detection of Clinically Significant Prostate Cancer. *J Urol* 2013 **189**(3):860-6
18. Department of Health. National Schedules of Reference Costs: financial year 2011 to 2012. London, 2013.
19. Bossuyt PM, Reitsma JB, Bruns DE, et al. The STARD statement for reporting studies of diagnostic accuracy: explanation and elaboration. *Ann Intern Med* 2003;**138**(1):W1-12
20. Moore CM, Kasivisvanathan V, Eggener S, et al. Standards of Reporting for MRI-targeted Biopsy Studies (START) of the Prostate: Recommendations from an International Working Group. *European Urology* 2013;**64**(4):544-52

1  
2  
3  
4  
5  
6  
7  
8  
9  
10  
11  
12  
13  
14  
15  
16  
17  
18  
19  
20  
21  
22  
23  
24  
25  
26  
27  
28  
29  
30  
31  
32  
33  
34  
35  
36  
37  
38  
39  
40  
41  
42  
43  
44  
45  
46  
47  
48  
49  
50  
51  
52  
53  
54  
55  
56  
57  
58  
59  
60

Figure 1

Structure of the decision tree

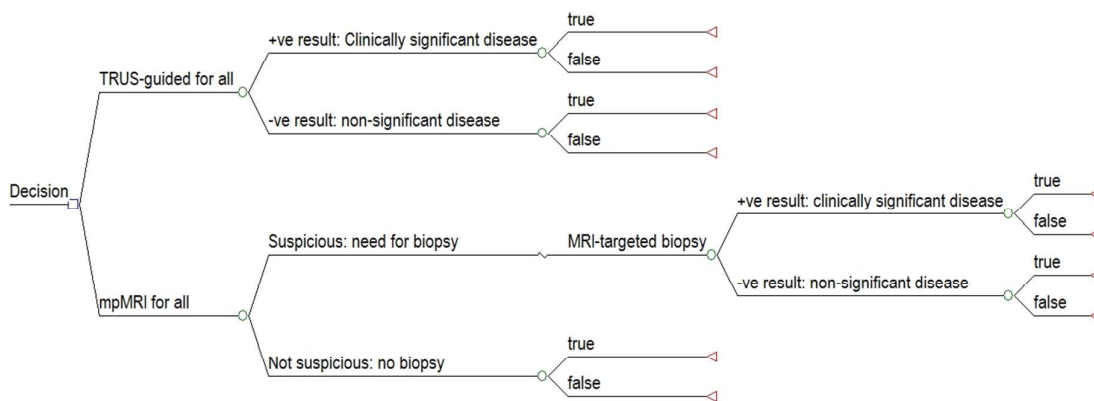

For review only

**Figure 2**

One-way sensitivity analysis showing the expected number of patients with wrong diagnoses according to the prevalence of clinically significant disease in a cohort of 1000 men. See text for further explanation.

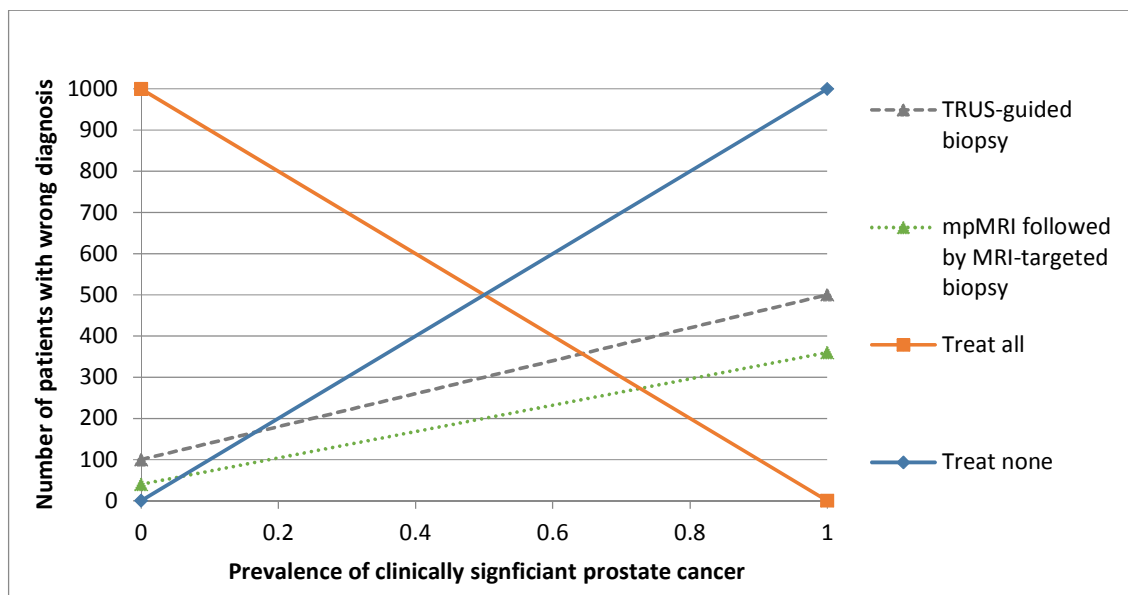

Review only

**Table 1**

Diagnostic accuracy estimates of TRUS-guided biopsy, mpMRI and MRI-guided biopsy used in the base case analysis

| Index Test          | Sensitivity                                     | Specificity                                                                                                              | Reference test                                                                                                               | Source and patient population                                                                                                                                             |
|---------------------|-------------------------------------------------|--------------------------------------------------------------------------------------------------------------------------|------------------------------------------------------------------------------------------------------------------------------|---------------------------------------------------------------------------------------------------------------------------------------------------------------------------|
| TRUS-guided biopsy  | <b>50%</b><br>(16/34 patients, 95% CIs: 30-65)  | <b>90%</b><br>(57/62 patients, 95% CIs: 82-97)                                                                           | Whole-mount pathology                                                                                                        | Lecornet 2012[13]: Simulated biopsy results on digitally reconstructed prostates of 96 men who had undergone surgery for bladder cancer which revealed prostate cancer.   |
| mpMRI               | <b>80%</b><br>(252/302, 95% CIs: 79-87)         | <b>60%</b><br>(154/253 patients, 95% CIs: 45-67)                                                                         | TRUS-guided extended systematic biopsies (10-12 core) plus two targeted biopsies for those with any area suspicious on MPMRI | Haffner 2011[14]: 555 men with suspected localised prostate cancer but no prior biopsy.                                                                                   |
| MRI-targeted biopsy | <b>80%</b><br>(94/121 patients, 95% CIs: 72-87) | <b>90%</b><br><i>Assumed to be equivalent to the specificity of TRUS-guided biopsy, (57/62 patients, 95% CIs: 82-97)</i> | 20 sector-TPM                                                                                                                | Kasivisvanathan 2012 [17]: 182 men who had a suspicious lesion on MPMRI; 78 of whom were biopsy naive, 32 had a prior negative biopsy and 72 had a prior positive biopsy. |

TRUS – transrectal ultrasound, TPM- template mapping biopsy, mpMRI – multi-parametric magnetic resonance imaging, MRI-TB – MRI-targeted biopsy. Data inputs were rounded to the nearest 5%.



1  
2  
3  
4  
5  
6  
7  
8  
9  
10  
11  
12  
13  
14  
15  
16  
17  
18  
19  
20  
21  
22  
23  
24  
25  
26  
27  
28  
29  
30  
31  
32  
33  
34  
35  
36  
37  
38  
39  
40  
41  
42  
43  
44  
45  
46  
47  
48  
49  
50  
51  
52  
53  
54  
55  
56  
57  
58  
59  
60

For peer review only

**Table 2**

Results of the decision analysis for a cohort of 1000 men comparing TRUS-guided biopsy with mpMRI and MRI-targeted biopsy.

|                                                                                    | <b>TRUS-guided biopsy</b> | <b>mpMRI then MRI-targeted biopsy</b> |
|------------------------------------------------------------------------------------|---------------------------|---------------------------------------|
| No of biopsies                                                                     | <b>1000</b>               | <b>600</b>                            |
| Patients with clinically significant cancer & correctly identified (True Positive) | <b>250</b>                | <b>320</b>                            |
| Patients with clinically significant cancer & wrongly identified (False Negative)  | <b>250</b>                | <b>180</b>                            |
| Patients with non-significant disease & correctly identified (True Negative)       | <b>450</b>                | <b>480</b>                            |
| Patients with non-significant disease & wrongly identified (False Positive)        | <b>50</b>                 | <b>20</b>                             |

# BMJ Open

## Multi-parametric MRI followed by targeted prostate biopsy for men with suspected prostate cancer: a clinical decision analysis

|                                 |                                                                                                                                                                                                                                                                                                                                                                                                                                                                                                                                                                                                                                                                                         |
|---------------------------------|-----------------------------------------------------------------------------------------------------------------------------------------------------------------------------------------------------------------------------------------------------------------------------------------------------------------------------------------------------------------------------------------------------------------------------------------------------------------------------------------------------------------------------------------------------------------------------------------------------------------------------------------------------------------------------------------|
| Journal:                        | <i>BMJ Open</i>                                                                                                                                                                                                                                                                                                                                                                                                                                                                                                                                                                                                                                                                         |
| Manuscript ID:                  | bmjopen-2014-004895.R1                                                                                                                                                                                                                                                                                                                                                                                                                                                                                                                                                                                                                                                                  |
| Article Type:                   | Research                                                                                                                                                                                                                                                                                                                                                                                                                                                                                                                                                                                                                                                                                |
| Date Submitted by the Author:   | 09-May-2014                                                                                                                                                                                                                                                                                                                                                                                                                                                                                                                                                                                                                                                                             |
| Complete List of Authors:       | Willis, Sarah; London School of Hygiene & Tropical Medicine, Department of Health Services Research & Policy<br>Ahmed, Hashim; Division of Surgery and Interventional Sciences, University College London<br>Moore, Caroline; University College London, Division of Surgery and Interventional Sciences<br>Donaldson, Ian; University College London, Division of Surgery and Interventional Sciences<br>Emberton, Mark; UCLH NHS FT, Urology<br>Miners, Alec; London School of Hygiene and Tropical Medicine, Department of Health Services Research & Policy<br>van der Meulen, Jan; London School of Hygiene and Tropical Medicine, Department of Health Services Research & Policy |
| <b>Primary Subject Heading</b>: | Diagnostics                                                                                                                                                                                                                                                                                                                                                                                                                                                                                                                                                                                                                                                                             |
| Secondary Subject Heading:      | Health economics                                                                                                                                                                                                                                                                                                                                                                                                                                                                                                                                                                                                                                                                        |
| Keywords:                       | biopsy, diagnosis, decision trees, Magnetic resonance imaging < RADIOLOGY & IMAGING, prostatic neoplasms                                                                                                                                                                                                                                                                                                                                                                                                                                                                                                                                                                                |
|                                 |                                                                                                                                                                                                                                                                                                                                                                                                                                                                                                                                                                                                                                                                                         |

SCHOLARONE™  
Manuscripts

1  
2  
3  
4  
5  
6  
7  
8  
9  
10  
11  
12  
13  
14  
15  
16  
17  
18  
19  
20  
21  
22  
23  
24  
25  
26  
27  
28  
29  
30  
31  
32  
33  
34  
35  
36  
37  
38  
39  
40  
41  
42  
43  
44  
45  
46  
47  
48  
49  
50  
51  
52  
53  
54  
55  
56  
57  
58  
59  
60

1 **Multi-parametric MRI followed by targeted prostate biopsy for men with suspected**  
2 **prostate cancer: a clinical decision analysis**

3 Sarah R Willis, Hashim U Ahmed, Caroline M Moore, Ian Donaldson, Mark Emberton, Alec H

4 Miners, Jan van der Meulen

5

6 Department of Health Services Research & Policy, London School of Hygiene & Tropical

7 Medicine, 15-17 Tavistock Place, London, WC1H 9SH.

8 Sarah R Willis, Research Fellow

9 Alec H Miners, Senior Lecturer

10 Jan van der Meulen, Professor of Clinical Epidemiology

11

12 Division of Surgery and Interventional Sciences, University College London, London UK and

13 Department of Urology, University College London Hospitals NHS Foundation Trust, London

14 Hashim U Ahmed, MRC Clinician Scientist

15 Caroline M Moore, Consultant Urologist

16 Ian Donaldson, Clinical Research Fellow

17 Mark Emberton, Director

18

19 Correspondence to: S Willis [sarah.willis@lshtm.ac.uk](mailto:sarah.willis@lshtm.ac.uk)

20 **Keywords:** biopsy; diagnosis; decision trees; magnetic resonance imaging; prostatic

21 neoplasms

22 **Word count of abstract:** 228

23 **Word count of text:** 3,175

1  
2  
3 24 **Note:** This publication presents independent research commissioned by the Health  
4  
5 25 Innovation Challenge Fund (HICF-T4-310), a parallel funding partnership between the  
6  
7 26 Wellcome Trust and the Department of Health. The views expressed in this publication are  
8  
9  
10 27 those of the authors and not necessarily those of the Wellcome Trust or the Department of  
11  
12 28 Health.  
13

14  
15 29  
16  
17 30 The Corresponding Author, Ms Sarah Willis, has the right to grant on behalf of all authors  
18  
19 31 and does grant on behalf of all authors, an exclusive licence (or non exclusive for  
20  
21 32 government employees) on a worldwide basis to the BMJ Publishing Group Ltd to permit  
22  
23 33 this article (if accepted) to be published in BMJ editions and any other BMJPGJL products and  
24  
25 34 sublicences such use and exploit all subsidiary rights, as set out in our licence.  
26  
27  
28

29 35  
30  
31  
32  
33  
34  
35  
36  
37  
38  
39  
40  
41  
42  
43  
44  
45  
46  
47  
48  
49  
50  
51  
52  
53  
54  
55  
56  
57  
58  
59  
60

1  
2  
3 36 **ABSTRACT (228 words)**  
4

5 37 **Objective:** To compare the diagnostic outcomes of the current approach of TRUS-guided  
6  
7 38 biopsy in men with suspected prostate cancer to an alternative approach using  
8  
9  
10 39 multiparametric MRI (mpMRI), followed by MRI-targeted biopsy if positive.  
11

12 40 **Design:** Clinical decision analysis was used to synthesise data from recently emerging  
13  
14  
15 41 evidence in a format that is relevant for clinical decision making.  
16

17 42 **Population:** A hypothetical cohort of 1000 men with suspected prostate cancer.  
18

19 43 **Interventions:** mpMRI and if positive MRI-targeted biopsy compared to TRUS-guided biopsy  
20  
21  
22 44 in all men.  
23

24 45 **Outcome measures:** We report the number of men expected to undergo a biopsy as well as  
25  
26 46 the numbers of correctly identified patients with or without prostate cancer. A probabilistic  
27  
28 47 sensitivity analysis was carried out using Monte Carlo simulation to explore the impact of  
29  
30 48 statistical uncertainty in the diagnostic parameters.  
31  
32

33 49 **Results:** In 1000 men, mpMRI followed by MRI-targeted biopsy “clinically dominates” TRUS-  
34  
35 50 guided biopsy as it results in fewer expected biopsies (600 versus 1000), more men being  
36  
37 51 correctly identified as having clinically significant cancer (320 versus 250), and fewer men  
38  
39 52 being falsely identified (20 versus 50). The mpMRI-based strategy dominated TRUS-guided  
40  
41 53 biopsy in 86% of the simulations in the probabilistic sensitivity analysis.  
42  
43

44 54 **Conclusions:** Our analysis suggests that mpMRI followed by MRI-targeted biopsy is likely to  
45  
46 55 result in fewer and better biopsies than TRUS-guided biopsy. Future research in prostate  
47  
48 56 cancer should focus on providing precise estimates of key diagnostic parameters.  
49  
50  
51  
52

53 57

54  
55 58 **STRENGTHS AND LIMITATIONS OF THE STUDY (132 words)**  
56  
57  
58  
59  
60

- 1  
2  
3 59 • There are no clinical studies that directly compare the standard diagnostic approach  
4 using TRUS-guided biopsy in all men with suspected prostate cancer with an approach  
5 60 where mpMRI is used to select men for biopsy and to guide the biopsy needle towards  
6 61 a suspicious lesion against an accepted gold standard.  
7  
8 62  
9  
10  
11 63 • Our decision analysis brings together emerging evidence on the diagnostic accuracy of  
12 64 TRUS-guided biopsy, mpMRI and MRI-targeted biopsies.  
13  
14  
15 65 • A probabilistic sensitivity analysis demonstrates that the mpMRI-based strategy was  
16 66 most effective in 86% of the simulations. However this sensitivity analysis did not assess  
17 67 the impact of structural uncertainties.  
18  
19  
20  
21 68 • This analysis focuses purely on short term clinical outcomes following different testing  
22 69 options. Ultimately, the optimal diagnostic strategy for men with suspected prostate  
23 70 cancer will depend on the impact on both costs and quality-adjusted life expectancy.  
24  
25  
26  
27  
28 71  
29  
30  
31  
32  
33  
34  
35  
36  
37  
38  
39  
40  
41  
42  
43  
44  
45  
46  
47  
48  
49  
50  
51  
52  
53  
54  
55  
56  
57  
58  
59  
60

1  
2  
3 72 **INTRODUCTION**  
4  
5  
6 73  
7  
8 74 Prostate cancer is the most common male cancer in most developed countries. Incidence  
9  
10 75 rates have risen rapidly over the past 15 years, in part due to the increase in prostate  
11  
12 76 specific antigen (PSA) testing. The use of PSA testing remains controversial as it lacks both  
13  
14 77 sensitivity and specificity for the detection of prostate cancer.<sup>1,2</sup> Despite the high incidence,  
15  
16 78 many men diagnosed with prostate cancer will not die from the disease so it is accepted  
17  
18 79 that a distinction should be made between prostate cancer that is unlikely to cause harm  
19  
20 80 (“clinically insignificant” disease) and cancer which, if untreated, may negatively impact  
21  
22 81 quality of life or lead to death (“clinically significant” disease). Whilst there is currently no  
23  
24 82 agreed threshold of significance, most commentators agree that clinically significant disease  
25  
26 83 should be declared when disease exceeds a certain volume or is populated by histological  
27  
28 84 patterns that exhibit poor differentiation (Gleason score).<sup>3-5</sup>  
29  
30  
31  
32  
33  
34 85  
35  
36 86 The optimal strategy for diagnosing clinically significant prostate cancer is the focus of a  
37  
38 87 rapidly developing body of research. The standard diagnostic approach for men with  
39  
40 88 suspected prostate cancer is to offer them a transrectal ultrasound (TRUS)-guided prostate  
41  
42 89 biopsy taking 10 to 12 cores.<sup>6-8</sup> The ultrasound guidance ensures the biopsy needles are  
43  
44 90 guided to zones within the gland which are considered to have an equal probability of  
45  
46 91 harbouring disease. An alternative to this is to identify areas of the prostate that are more  
47  
48 92 likely to contain cancer, and to sample from these during biopsy. The test that is currently  
49  
50 93 gaining most favour in conferring this information is multi-parametric MRI (mpMRI).<sup>9</sup>  
51  
52  
53  
54  
55 94  
56  
57  
58  
59  
60



1  
2  
3 95 An MRI-based approach to diagnosis would require all men with raised PSA to have an  
4  
5 96 mpMRI. Men who are negative on mpMRI would receive no further biopsy. The men with a  
6  
7 97 suspicious lesion on mpMRI would undergo an MRI-targeted biopsy. During MRI-targeted  
8  
9 98 biopsy, the biopsy needle can be directed by the clinician using prior mpMR images and  
10  
11 99 real-time ultrasound (“visual or cognitive registration”), by using assistive technology that  
12  
13 100 digitally overlays the target information derived from the mpMRI directly onto the  
14  
15 101 ultrasound image (“computer-aided registration” or “image fusion”) or the biopsy can be  
16  
17 102 performed within the MR scanner itself (“in-bore biopsy” or “MR-guided MR biopsy”).  
18  
19 103 Irrespective of the image-guided technique, an mpMRI-based approach to diagnosis has  
20  
21 104 three potential advantages. First, patients with no lesion on mpMRI could avoid a prostate  
22  
23 105 biopsy. Second, patients with clinically insignificant disease would avoid diagnosis and  
24  
25 106 subsequent inappropriate treatment which carries risk of side-effects and no benefit in  
26  
27 107 terms of survival. Third, using mpMRI for targeting may improve the detection of clinically  
28  
29 108 significant cancers and improve risk stratification.  
30  
31  
32  
33  
34  
35  
36  
37

38 110 The UK’s National Institute of Health and Care Excellence (NICE) has recently acknowledged  
39  
40 111 the utility of mpMRI, but stopped short of a recommendation to offer pre-biopsy mpMRI to  
41  
42 112 all men.<sup>7</sup> It remains controversial partly due to doubts about the performance and  
43  
44 113 reproducibility of mpMRI. Despite this, many providers have adopted an image-guided  
45  
46 114 biopsy approach in response to a man presenting with an elevated PSA.<sup>10</sup>  
47  
48  
49  
50  
51

52 116 We summarise what can be understood from recently emerging evidence in a format that is  
53  
54 117 relevant for clinical decision making. We carried out a decision analysis to compare a  
55  
56  
57  
58  
59  
60

1  
2  
3 118 simplified version of the current standard diagnostic approach (TRUS-guided biopsy) with an  
4  
5 119 approach where mpMRI is used to select men for biopsy and to guide the biopsy needle  
6  
7  
8 120 towards the area of suspected cancer. We estimate the number of biopsies that could be  
9  
10 121 avoided with pre-biopsy mpMRI and the number of correctly identified patients with and  
11  
12 122 without clinically significant prostate cancer.  
13

14  
15 123

For peer review only

1  
2  
3 124 **METHODS**  
4  
5

6 125  
7

8 126 *Decision analysis*  
9

10 127 We used a decision tree to compare the standard diagnostic pathway (TRUS-guided biopsy  
11  
12 128 for all) with a new pathway (mpMRI for all, then MRI-targeted biopsy if positive). The tree,  
13  
14 129 presented in Figure 1, was evaluated to reveal the expected outcomes associated with each  
15  
16 130 option, for a hypothetical cohort of 1000 men by multiplying the prevalence estimates of  
17  
18 131 our target condition by sensitivity and specificity estimates of the diagnostic tests. The test  
19  
20 132 accuracy estimates used to populate the decision tree were derived from recent studies  
21  
22 133 which reported data that reflected the conditional nature of the parameters and used an  
23  
24 134 appropriate reference test.<sup>11 12</sup> All of these data are limited in some way, but assumptions  
25  
26 135 were made so that any biases would favour the current diagnostic approach.  
27  
28  
29  
30  
31  
32

33 136

34 137 *Target population*  
35

36 138 The target population for the decision analysis was men with increased serum PSA levels or  
37  
38 139 abnormal findings on digital rectal examination who had never had a prostate biopsy.  
39  
40

41 140

42  
43 141 *Clinically significant disease*  
44

45 142 For our base-case analysis we defined clinically significant disease according to widely used,  
46  
47 143 and arguably somewhat conservative, criteria: a minimum volume of 0.2cc or cell  
48  
49 144 differentiation corresponding to a Gleason score of 3+4 or higher.<sup>13</sup> The prevalence of  
50  
51 145 clinically significant disease in our target population is uncertain, but we estimated it to be  
52  
53 146 50% of all men with suspected prostate cancer, based on a prospective analysis of men  
54  
55  
56  
57  
58  
59  
60

1  
2  
3 147 undergoing a first prostate biopsy.<sup>14</sup> The remaining 50% are assumed to have clinically  
4  
5 148 insignificant disease or no cancer. We varied the prevalence of clinically significant disease  
6  
7  
8 149 in a sensitivity analysis.  
9

10 150

### 11 151 *TRUS-guided biopsy*

12  
13  
14  
15 152 The gold standard used to establish the presence or absence of clinically significant disease -  
16  
17 153 whole-mount pathological data - is usually only available for men who test positive and then  
18  
19 154 go on to have radical surgery.<sup>7 11 15</sup> Therefore we used data from a study which carried out  
20  
21 155 computer simulations to estimate the performance characteristics of TRUS-guided biopsy by  
22  
23 156 comparing them to reconstructed whole-mount pathology obtained from patients  
24  
25  
26 157 undergoing surgery for bladder cancer, which revealed they also had prostate cancer.<sup>16</sup> The  
27  
28 158 spectrum of disease in this sample population is likely to include more early-stage disease  
29  
30 159 than would be expected in an unscreened UK population, and thus this bias will favour the  
31  
32  
33 160 current diagnostic approach.  
34

35  
36 161

37  
38 162 The sensitivity of TRUS-guided biopsy, when criteria proposed by Epstein were used to  
39  
40 163 interpret the diagnostic result, was approximately 50%.<sup>16</sup> According to Epstein, a biopsy  
41  
42 164 result is positive for significant cancer if the maximum cancer core length from biopsy is at  
43  
44 165 least 3mm or if the Gleason score is 3+4 or higher.<sup>13</sup> The corresponding specificity of TRUS-  
45  
46 166 guided biopsy was estimated to be approximately 90%, which represents the proportion of  
47  
48 167 men correctly identified with insignificant disease (men with no prostate cancer were not  
49  
50 168 included in the Lecornet et al. study population).<sup>16</sup>  
51  
52

53 169  
54  
55  
56  
57  
58  
59  
60

1  
2  
3 170  
45 171 *mpMRI and MRI-targeted biopsy*  
67 172 We estimated the diagnostic accuracy of the MRI-based strategy by combining the test  
89  
10 173 accuracy estimates for mpMRI and MRI-targeted biopsy. A recent systematic review of the  
1112 174 literature revealed two studies on mpMRI in biopsy-naïve men with suspected prostate  
1314 175 cancer.<sup>11 17 18</sup> Only one of these studies reported data at the level of detail required to  
1516 176 estimate sensitivity and specificity of mpMRI: a large study involving 555 men which  
1718 177 compared pre-biopsy mpMRI results with TRUS-guided biopsy and/or MRI-targeted biopsy  
1920 178 as a proxy for true disease status.<sup>17</sup> We used these data to estimate the sensitivity of  
2122 179 mpMRI at 80% and the specificity, 60%. A more recent study shows these values may in  
2324 180 fact underestimate the performance of mpMRI.<sup>14</sup>  
25  
26  
27  
2829 181  
3031 182 The accuracy of MRI-targeted biopsy was taken from a study that compared MRI-targeted  
3233 183 biopsy with cognitive registration to 20-sector template-prostate mapping.<sup>19</sup> This study was  
3435 184 used since all men in the study population had a lesion on mpMRI and therefore allowed us  
3637 185 to capture the sequential nature of the diagnostic approach. The study showed that when  
3839 186 the biopsies were classified according to the Epstein criteria, the sensitivity was  
4041 187 approximately 80% and the specificity 80%.<sup>19</sup> The specificity that this study reported for the  
4243 188 MRI-targeted biopsy is lower than our estimate of the specificity of TRUS-guided biopsy  
4445 189 (90%).<sup>19</sup> However, the use of MRI-targeting instead of TRUS-guided biopsy should have no  
4647 190 impact on men without clinically significant disease, and therefore we assumed that MRI-  
4849 191 targeted biopsy should be as good as – but not better than – TRUS-guided biopsy at  
5051 192 correctly identifying men without clinically significant prostate cancer. We therefore used  
52  
53  
54  
55  
56  
57  
58  
59  
60

1  
2  
3 193 90% as the specificity estimate for MRI-targeted biopsy in the decision analysis, the same as  
4  
5 194 that of TRUS-guided biopsy. We assessed the impact this had on the overall diagnostic  
6  
7 195 results in a sensitivity analysis.  
8  
9

10 196

### 11 12 197 *Sensitivity Analysis*

13  
14 198 We carried out a one-way sensitivity analysis by varying the prevalence of clinically  
15  
16 199 significant disease from 0 to 1, keeping all other variables constant. This sensitivity analysis  
17  
18 200 was intended to demonstrate the extent to which the optimal diagnostic strategy depends  
19  
20 201 on the prevalence of clinically significant disease. We also carried out two sensitivity  
21  
22 202 analyses to assess the impact of specific test performance estimates of the mpMRI-based  
23  
24 203 strategy on overall diagnostic outcomes. In the first scenario (scenario i) we used a pooled  
25  
26 204 estimate of mpMRI test performance from a recent meta-analysis (mpMRI sensitivity 74%,  
27  
28 205 mpMRI specificity 88%).<sup>20</sup> In the second scenario (scenario ii) we investigated the impact of  
29  
30 206 our assumption that MRI-targeting has no impact on men without clinically significant  
31  
32 207 disease (by using a specificity of 80% for MRI-targeted biopsy as reported by  
33  
34 208 Kasivisvanathan and colleagues rather than our base case estimate of 90%).<sup>19</sup>  
35  
36  
37  
38  
39  
40  
41  
42

43 210 Although these sensitivity analyses provide some insight into the specific impact of  
44  
45 211 individual parameters, the estimates used to describe the performance of all the diagnostic  
46  
47 212 tests are associated with significant uncertainties. Therefore, to assess the robustness of our  
48  
49 213 results, we performed a probabilistic sensitivity analysis using Monte Carlo simulation  
50  
51 214 varying the sensitivities and specificities of the three tests (TRUS-guided biopsy, mpMRI, and  
52  
53 215 MRI-targeted biopsy) simultaneously over 2000 iterations, sampling from beta distributions  
54  
55  
56  
57  
58  
59  
60

1  
2  
3 216 to characterise the uncertainty in the test accuracy data (see table 1). We determined the  
4  
5 217 beta distributions by assuming that the sensitivities and specificities were observed in  
6  
7 218 populations consisting of 50 men with and 50 men without clinically significant disease. We  
8  
9  
10 219 substantially widened the distributions (by assuming a small population of men) in order to  
11  
12 220 increase the uncertainty associated with the test performance parameters. We ignored the  
13  
14  
15 221 correlation between sensitivity and specificity and kept the disease prevalence constant at  
16  
17 222 50%.  
18  
19  
20 223  
21  
22 224  
23  
24 225  
25  
26  
27  
28  
29  
30  
31  
32  
33  
34  
35  
36  
37  
38  
39  
40  
41  
42  
43  
44  
45  
46  
47  
48  
49  
50  
51  
52  
53  
54  
55  
56  
57  
58  
59  
60

226 **RESULTS**

227

228 The decision tree estimated that the use of TRUS-guided biopsy in a hypothetical cohort of  
229 1000 men with suspected prostate cancer – and an estimated 50% prevalence of clinically  
230 significant disease – would result in 300 positive and 700 negative biopsy results, which  
231 would correctly identify 250 men with clinically significant prostate cancer and 450 men  
232 without the disease (Table 2). It follows that 250 men with significant prostate cancer would  
233 be missed by TRUS-guided biopsy and 50 men who do not have significant prostate cancer  
234 would wrongly receive a diagnosis.

235

236 The use of mpMRI and MRI-targeted biopsy in the same cohort would result in 600 men  
237 undergoing a prostate biopsy with 340 positive and 260 negative biopsy results (Table 2).  
238 This strategy would correctly identify 320 men as having significant prostate cancer and 480  
239 without the disease. In other words, the use of the mpMRI-based strategy would fail to  
240 diagnose significant cancer in 180 men ( $= 500 - 320$ ), which is the result of significant  
241 prostate cancer that were missed by mpMRI in addition to significant cancers that were  
242 identified on the mpMRI but were missed by MRI-targeted biopsy. 20 men ( $= 500 - 480$ ) who  
243 do not have clinically significant prostate cancer would wrongly receive a diagnosis.

244

245 Multi-parametric MRI followed by MRI-targeted biopsy can be said to “clinically dominate”  
246 TRUS-guided biopsy as it results in fewer expected biopsies (600 versus 1000), more men  
247 being correctly identified as having clinically significant disease (320 versus 250), and fewer  
248 men being falsely identified with the disease (20 versus 50).



1  
2  
3 249

4  
5 250 Figure 2 provides a visual representation of the one-way sensitivity analysis showing the  
6  
7  
8 251 total number of people receiving the wrong diagnosis (the sum of the number of patients  
9  
10 252 with a false-positive or a false-negative result) as a function of the prevalence of clinically  
11  
12 253 significant disease. The mpMRI-based approach resulted in a lower number of patients  
13  
14 254 wrongly diagnosed than with TRUS-guided biopsy for all men, at all prevalence rates. Below  
15  
16 255 a prevalence of 5%, doing nothing is the “optimal” strategy as it leads to the lowest number  
17  
18  
19 256 of men with the wrong diagnosis. Above a prevalence of 70%, treating all men is optimal.  
20  
21

22 257

23  
24 258 Table 3 demonstrates that assuming a sensitivity of 74% and a specificity of 88% as  
25  
26 259 estimates of the test performance of mpMRI (instead of a sensitivity of 80% and a specificity  
27  
28  
29 260 of 60% used in the base case analysis) found that the mpMRI-based strategy resulted in far  
30  
31 261 fewer biopsies than our base case estimation (430 instead of 600), but slightly worse  
32  
33 262 diagnostic outcomes for men with significant disease (296 correctly identified instead of  
34  
35 263 320), which was still better than the current standard of care (250 correctly identified).

36  
37  
38 264 Table 3 also shows that using a lower specificity for MRI-targeted biopsy (80% instead of  
39  
40 265 90%) resulted in 40 men (instead of 20) without clinically significant disease wrongly  
41  
42 266 identified as having significant cancer, but this is still less than the 50 men that would be  
43  
44 267 wrongly identified using the standard diagnostic approach using TRUS-guided biopsy alone.  
45  
46

47 268

48  
49 269 When the sensitivities and specificities of the three tests were varied simultaneously in 2000  
50  
51 270 simulations for the probabilistic sensitivity analysis, the diagnostic approach using mpMRI  
52  
53 271 and MRI-targeted biopsy clinically dominated in 86% of the simulations, whereas TRUS-

1  
2  
3 272 guided biopsy dominated in 0.8% of the simulations. Within the remaining 13.2% of  
4  
5 273 simulations, the choice between the mpMRI-based strategy and TRUS-guided biopsy is not  
6  
7  
8 274 clear as there was a 'trade-off' between outcomes. That is, either the mpMRI-based strategy  
9  
10 275 correctly identified more men with clinically significant cancer but fewer men without  
11  
12 276 clinically significant disease than TRUS-guided biopsy, or vice-versa.  
13  
14  
15 277

For peer review only

1  
2  
3 278 **DISCUSSION**  
4

5 279  
6

7  
8 280 Our decision analysis suggests that mpMRI of the prostate followed by MRI-targeted biopsy  
9  
10 281 if positive could result in fewer and better biopsies than a strategy using only TRUS-guided  
11  
12 282 biopsy. The results suggest that the mpMRI-based strategy could reduce the number of  
13  
14 283 biopsies by about one third (600 compared to 1000 biopsies), increase the number of men  
15  
16 284 identified with clinically significant cancer by about 30% (320 compared to 250 patients),  
17  
18 285 and reduce the number of men falsely identified with the disease by 60% (20 compared to  
19  
20 286 50). These results are in line with those of recent clinical studies comparing similar  
21  
22 287 strategies, albeit not against a gold standard of pathology or template biopsy.<sup>21 22</sup>  
23  
24  
25  
26  
27

28 288

29 289 When we accounted for uncertainty in the sensitivity and specificity estimates of the three  
30  
31 290 diagnostic tests, we found that the dominance of the mpMRI-based strategy was robust.  
32

33 291 However, the probabilistic sensitivity analysis did not assess the impact of inherent  
34  
35 292 “structural” uncertainties, such as the ongoing debate about the definition of clinically  
36  
37 293 significant cancer, various diagnostic thresholds used to decide whether mpMRI or biopsy  
38  
39 294 results are positive or negative, and the use of imperfect gold-standard tests.  
40  
41  
42

43 295  
44

45 296 The National Institute for Health and Care Excellence (NICE), has recently updated its  
46  
47 297 guidance on the diagnosis and management of men with prostate cancer.<sup>7</sup> Our estimate of  
48  
49 298 the sensitivity of 50% for TRUS-guided biopsy is close to the estimate of 45% used in its  
50  
51 299 analysis.<sup>7</sup> However, we estimated the specificity of the TRUS-guided biopsy to be 90%,  
52  
53 300 whilst NICE assumed it to be 100%. While both of these specificity estimates are somewhat  
54  
55  
56  
57  
58  
59  
60

1  
2  
3 301 speculative, we believed that the specificity estimate needed to reflect that patients who  
4  
5 302 have clinically insignificant prostate cancer may have biopsy results that are interpreted as  
6  
7 303 suggestive of clinically significant cancer. We also assumed that this “error” is as likely with  
8  
9 304 TRUS-guided as with MRI-targeted biopsies and therefore we used the same false-positive  
10  
11 305 rate for TRUS-guided and for MRI-targeted biopsies. ~~These choices were made deliberately~~  
12  
13 306 ~~in order to underestimate the comparative effectiveness of the proposed diagnostic~~  
14  
15 307 ~~strategy using mpMRI.~~ In addition we used data on the test accuracy of MRI-targeted biopsy  
16  
17 308 from a study which used visual registration techniques. It has been suggested that  
18  
19 309 computer-aided registration techniques may be more accurate,<sup>7</sup> although recent RCT data  
20  
21 310 showed no statistically significant difference in detection rates.<sup>23</sup>  
22  
23  
24  
25  
26  
27  
28

29 312 The results of our analysis are based on a simplification of the choices facing urologists in  
30  
31 313 the diagnosis of prostate cancer. In their evaluation, NICE considered a strategy of mpMRI  
32  
33 314 and biopsy for all men, including targeted biopsies for all men with a lesion on mpMRI. This  
34  
35 315 perhaps highlights the reticence of health care professionals to do ‘less’ rather than ‘more’,  
36  
37 316 which may be influenced by concern over medical liability. A major challenge therefore will  
38  
39 317 be the implementation of a strategy that requires a negative diagnostic test result to be  
40  
41 318 established and then followed by no immediate further investigation. New guidelines based  
42  
43 319 on the results of forthcoming randomised controlled trials (such as PROMIS) and expert  
44  
45 320 consensus may be required to avoid a “creep” in the numbers of unnecessary biopsies.<sup>24</sup>  
46  
47  
48  
49

50 321  
51  
52 322 In this analysis we focussed purely on short term clinical outcomes following different  
53  
54 323 testing options. Ultimately however the optimal diagnostic strategy for men with suspected  
55  
56  
57  
58  
59  
60

1  
2  
3 324 prostate cancer will depend on the impact on both costs and quality-adjusted life  
4  
5 325 expectancy. The cost of the diagnostic procedures may in fact be about the same for the  
6  
7  
8 326 two diagnostic strategies. If all men receive an mpMRI (£200 in 2011-12 UK NHS prices) and  
9  
10 327 60% of these men also receive a biopsy (£540 in 2011-12 UK NHS prices) the mpMRI-based  
11  
12 328 strategy will result in an average cost of £524 per man, assuming TRUS-guided biopsy and  
13  
14  
15 329 MRI-targeted biopsy are equivalent in cost.<sup>25</sup> This compares to £540 per man with TRUS-  
16  
17 330 guided biopsy. Of course the true costs of the two strategies include the long term costs and  
18  
19 331 consequences of further investigations and treatments which need to be taken into account  
20  
21 332 in future economic modelling. Initial estimates from a published economic evaluation  
22  
23 333 suggest a mpMRI-based strategy is likely to be highly cost-effective in the Netherlands<sup>26</sup>  
24  
25 334 although uncertainties, particularly around long term health outcomes, remain.<sup>27</sup>  
26  
27  
28  
29 335  
30  
31 336 Despite the complexity of the downstream pathways, estimates of diagnostic performance  
32  
33 337 and disease prevalence will be key drivers of the clinical and cost effectiveness of the whole  
34  
35 338 of prostate cancer care. Systematic reviews of the prostate biopsy and imaging literature  
36  
37 339 have revealed a large number of small studies characterised by poor reporting and  
38  
39 340 important biases.<sup>7 11 12 15</sup> In our analysis we only used very recently published studies that  
40  
41 341 capture the emerging evidence on how well TRUS-guided biopsy, mpMRI and MRI-targeted  
42  
43 342 biopsy perform and estimate disease prevalence. Future research efforts in prostate cancer  
44  
45 343 need to focus on providing accurate and precise estimates of these parameters. Studies  
46  
47 344 need to consistently distinguish between significant and insignificant cancer, represent the  
48  
49 345 sequential nature of diagnostic tests and should adhere to high standards of reporting such  
50  
51 346 as the START guidelines for MRI.<sup>28 29</sup> Without these studies, it will be hard to accurately  
52  
53  
54  
55  
56  
57  
58  
59  
60

1  
2  
3  
4  
5  
6  
7  
8  
9  
10  
11  
12  
13  
14  
15  
16  
17  
18  
19  
20  
21  
22  
23  
24  
25  
26  
27  
28  
29  
30  
31  
32  
33  
34  
35  
36  
37  
38  
39  
40  
41  
42  
43  
44  
45  
46  
47  
48  
49  
50  
51  
52  
53  
54  
55  
56  
57  
58  
59  
60

347 evaluate the role of targeted biopsy or any new strategy for diagnosing prostate cancer in  
348 future.  
349

For peer review only

1  
2  
3 350 **CONCLUSIONS**

4 351

5 352 Our analysis suggests that mpMRI followed by MRI-targeted biopsy may result in fewer and

6  
7 353 better biopsies than TRUS-guided biopsy. We found that the mpMRI-based strategy

8  
9 354 correctly identified more men with significant prostate cancer and correctly identified more

10  
11 355 men without the disease in 86% of the simulations in our probabilistic sensitivity analysis.

12  
13 356 Estimates of disease prevalence and diagnostic performance will be key drivers of a full

14  
15 357 economic analysis, so research efforts should focus on providing precise estimates of these

16  
17 358 crucial parameters.  
18  
19  
20  
21  
22  
23  
24  
25  
26  
27  
28  
29  
30  
31  
32  
33  
34  
35  
36  
37  
38  
39  
40  
41  
42  
43  
44  
45  
46  
47  
48  
49  
50  
51  
52  
53  
54  
55  
56  
57  
58  
59  
60

1  
2  
3 359 **ACKNOWLEDGEMENTS**  
4

5 360 The authors would like to thank Yipeng Hu and Veeru Kasivisvanathan for their assistance in  
6  
7 361 providing additional data for the analysis. We also acknowledge the research support Mark  
8  
9  
10 362 Emberton receives from the United Kingdom's National Institute of Health Research  
11  
12 363 UCL/UCLH Biomedical Research Centre, London.  
13

14 364

15  
16  
17 365 This publication presents independent research commissioned by the Health Innovation  
18  
19 366 Challenge Fund (HICF-T4-310), a parallel funding partnership between the Wellcome Trust  
20  
21 367 and the Department of Health. The views expressed in this publication are those of the  
22  
23 368 authors and not necessarily those of the Wellcome Trust or the Department of Health.  
24  
25

26 369 **FUNDING**  
27

28  
29 370 This work was funded by the Health Innovation Challenge Fund (Wellcome Trust and UK  
30  
31 371 Department of Health) Award Number: HICF-T4-310  
32

33 372 **AUTHOR CONTRIBUTIONS**  
34

35 373  
36 374 JvdM, SW, AM, HA, ME made substantial contributions to the conception and design of the  
37  
38 375 work; SW, HA, CM and ID acquired the data; SW, JvdM, HA, CM and ID analysed and  
39  
40 376 interpreted the data; SW and JvdM drafted the work and HA, CM, ID, ME, AM provided  
41  
42 377 critical revision of the manuscript; ME, HA, CM, JvdM, SW and AM obtained funding and  
43  
44 378 JvdM and AM provided supervision. All authors have read and approved the final  
45  
46 379 manuscript and agree to be accountable for all aspects of the work.  
47

48 380  
49  
50  
51  
52 381  
53  
54  
55 382  
56  
57  
58  
59  
60



1  
2  
3 383 **COMPETING INTERESTS**  
4

5 384 All authors have completed the ICMJE uniform disclosure  
6 at [www.icmje.org/coi\\_disclosure.pdf](http://www.icmje.org/coi_disclosure.pdf) and declare: financial support for the submitted work  
7  
8 386 from the Wellcome Trust and the Department of Health (for all authors); Prof. Mark  
9 387 Emberton is a consultant/investigator for USHIFU, STEBA Biotech, Sanofi Aventis,  
10 388 GlaxoSmithKline and Angiodynamics, is a consultant for Sophiris and is a director of  
11 389 Mediwatch PLC. Mr. Hashim Ahmed is an investigator for USHIFU, Angiodynamics and  
12 390 Advanced Medical Diagnostics (AMD). Ms. Caroline Moore has received research grants  
13 391 from GlaxoSmithKline, the Wellcome Trust and Advanced Medical Diagnostics (AMD), is a  
14 392 consultant/investigator for STEBA Biotech and has been paid for lecturing by Sanofi. Prof.  
15 393 Jan vanderMeulen, Dr. Alec Miners and Ms. Sarah Willis have no other interests to disclose.  
16  
17 394

18  
19  
20 395 Ethical approval was not required for this study. The data inputs, the decision tree structure  
21  
22 396 and the calculations are given in full so no additional data are available  
23

24 397 **DATA SHARING STATEMENT**  
25

26 398 The data inputs, the decision tree structure and the calculations are given in full so no  
27  
28 399 additional data are available.  
29

30  
31 400 **FIGURE LEGENDS**  
32

33  
34 401 **Figure 1:** Structure of the decision tree  
35

36 402 **Figure 2:** One-way sensitivity analysis showing the expected number of patients with wrong  
37  
38 403 diagnoses according to the prevalence of clinically significant disease in a cohort of 1000  
39  
40 404 men. See text for further explanation.  
41

42  
43 405 **Table 1:** Diagnostic accuracy estimates of TRUS-guided biopsy, mpMRI and MRI-targeted  
44  
45 406 biopsy used in the base case analysis. *TRUS – transrectal ultrasound, TPM- template*  
46  
47 407 *mapping biopsy, mpMRI – multi-parametric magnetic resonance imaging, MRI-TB – MRI-*  
48  
49 408 *targeted biopsy. Data inputs were rounded to the nearest 5%. Beta distributions were*  
50  
51 409 *estimated using the integer form in Excel according to the parameters  $\alpha$  and  $\beta$ .*  
52  
53  
54  
55  
56  
57  
58  
59  
60

1  
2  
3 410 **Table 2:** Details of calculations and results of the decision analysis for a cohort of 1000 men  
4  
5 411 comparing TRUS-guided biopsy with mpMRI and MRI-targeted biopsy. *'prev'* – prevalence;  
6  
7 412 *'no\_in\_cohort'* – number of men in cohort; *'sensTRUS'* – sensitivity of TRUS-guided biopsy; *'specTRUS'* –  
8  
9 413 specificity of TRUS-guided biopsy; *'sensMRI'* – sensitivity of mpMRI; *'specMRI'* – specificity of mpMRI;  
10  
11 414 *'sensMRITB'* – sensitivity of MRI-targeted biopsy; *'specMRITB'* – specificity of MRI-targeted biopsy.  
12

13  
14 415 **Table 3:** Results of sensitivity analyses in a cohort of 1000 men  
15

16 416  
17

18 417  
19  
20  
21  
22  
23  
24  
25  
26  
27  
28  
29  
30  
31  
32  
33  
34  
35  
36  
37  
38  
39  
40  
41  
42  
43  
44  
45  
46  
47  
48  
49  
50  
51  
52  
53  
54  
55  
56  
57  
58  
59  
60

418 **REFERENCES**

- 419
- 420 1. Wolf AM, Wender RC, Etzioni RB, et al. American Cancer Society guideline for the early  
421 detection of prostate cancer: update 2010. *CA Cancer J Clin* 2010;**60**(2):70-98.
- 422 2. Esserman L, Shieh Y, Thompson I. Rethinking screening for breast cancer and prostate  
423 cancer. *JAMA* 2009;**302**(15):1685-92.
- 424 3. Ahmed HU, Hu Y, Carter T, et al. Characterizing clinically significant prostate cancer using  
425 template prostate mapping biopsy. *J Urol* 2011;**186**(2):458-64.
- 426 4. Stamey TA, Freiha FS, McNeal JE, et al. Localized prostate cancer. Relationship of tumor  
427 volume to clinical significance for treatment of prostate cancer. *Cancer* 1993;**71**(3  
428 Suppl):933-8.
- 429 5. Goto Y, Ohori M, Arakawa A, et al. Distinguishing clinically important from unimportant  
430 prostate cancers before treatment: value of systematic biopsies. *J Urol*  
431 1996;**156**(3):1059-63.
- 432 6. Heidenreich A, Bastian PJ, Bellmunt J, et al. EAU guidelines on prostate cancer. part 1:  
433 screening, diagnosis, and local treatment with curative intent-update 2013. *Eur Urol*  
434 2014;**65**(1):124-37.
- 435 7. National Institute for Health and Care Excellence. Prostate cancer: diagnosis and  
436 treatment (CG 175). London, 2014.
- 437 8. Prostate Cancer Risk Management Programme. Undertaking a transrectal ultrasound  
438 guided biopsy of the prostate. 2006.  
439 [www.cancerscreening.nhs.uk/prostate/pcrmp01.pdf](http://www.cancerscreening.nhs.uk/prostate/pcrmp01.pdf).
- 440 9. Lee DJ, Ahmed HU, Moore CM, et al. Multiparametric magnetic resonance imaging in the  
441 management and diagnosis of prostate cancer: current applications and strategies.  
442 *Curr Urol Rep* 2014;**15**(3):390.
- 443 10. Emberton M. Has magnetic resonance-guided biopsy of the prostate become the  
444 standard of care? *Eur Urol* 2013;**64**(5):720-1.
- 445 11. Moore CM, Robertson NL, Arsanious N, et al. Image-guided prostate biopsy using  
446 magnetic resonance imaging-derived targets: a systematic review. *Eur Urol*  
447 2013;**63**(1):125-40.
- 448 12. Mowatt G, Scotland G, Boachie C, et al. The diagnostic accuracy and cost-effectiveness  
449 of magnetic resonance spectroscopy and enhanced magnetic resonance imaging  
450 techniques in aiding the localisation of prostate abnormalities for biopsy: a  
451 systematic review and economic evaluation. *Health Technol Assess* 2013;**17**(20):1-  
452 281.

- 1  
2  
3 453 13. Epstein JI, Walsh PC, Carmichael M, et al. Pathologic and clinical findings to predict  
4 454 tumor extent of nonpalpable (stage t1c) prostate cancer. JAMA 1994;**271**(5):368-74.  
5  
6 455 14. Kuru TH, Roethke MC, Seidenader J, et al. Critical Evaluation of Magnetic Resonance  
7 456 Imaging Targeted, Transrectal Ultrasound Guided Transperineal Fusion Biopsy for  
8 457 Detection of Prostate Cancer. J Urol 2013;**190**(4):1380-6.  
9  
10  
11 458 15. Eichler K, Hempel S, Wilby J, et al. Diagnostic value of systematic biopsy methods in the  
12 459 investigation of prostate cancer: a systematic review. J Urol 2006;**175**(5):1605-12.  
13  
14 460 16. Lecornet E, Ahmed HU, Hu Y, et al. The accuracy of different biopsy strategies for the  
15 461 detection of clinically important prostate cancer: a computer simulation. J Urol  
16 462 2012;**188**(3):974-80.  
17  
18  
19 463 17. Haffner J, Lemaitre L, Puech P, et al. Role of magnetic resonance imaging before initial  
20 464 biopsy: comparison of magnetic resonance imaging-targeted and systematic biopsy  
21 465 for significant prostate cancer detection. BJU Int 2011;**108**(8 Pt 2):E171-8.  
22  
23 466 18. Park BK, Park JW, Park SY, et al. Prospective evaluation of 3-T MRI performed before  
24 467 initial transrectal ultrasound-guided prostate biopsy in patients with high prostate-  
25 468 specific antigen and no previous biopsy. AJR American journal of roentgenology  
26 469 2011;**197**(5):W876-81.  
27  
28  
29 470 19. Kasivisvanathan V, Dufour R, Moore CM, et al. Transperineal Magnetic Resonance Image  
30 471 Targeted Prostate Biopsy Versus Transperineal Template Prostate Biopsy in the  
31 472 Detection of Clinically Significant Prostate Cancer. J Urol 2013 **189**(3):860-6.  
32  
33 473 20. de Rooij M, Hamoen EH, Futterer JJ, et al. Accuracy of multiparametric MRI for prostate  
34 474 cancer detection: a meta-analysis. AJR American journal of roentgenology  
35 475 2014;**202**(2):343-51.  
36  
37  
38 476 21. Pokorny MR, de Rooij M, Duncan E, et al. Prospective Study of Diagnostic Accuracy  
39 477 Comparing Prostate Cancer Detection by Transrectal Ultrasound-Guided Biopsy  
40 478 Versus Magnetic Resonance (MR) Imaging with Subsequent MR-guided Biopsy in  
41 479 Men Without Previous Prostate Biopsies. Eur Urol 2014.  
42  
43  
44 480 22. Siddiqui MM, Rais-Bahrami S, Truong H, et al. Magnetic resonance imaging/ultrasound-  
45 481 fusion biopsy significantly upgrades prostate cancer versus systematic 12-core  
46 482 transrectal ultrasound biopsy. Eur Urol 2013;**64**(5):713-9.  
47  
48  
483 483 23. Wysock JS, Rosenkrantz AB, Huang WC, et al. A Prospective, Blinded Comparison of  
49 484 Magnetic Resonance (MR) Imaging-Ultrasound Fusion and Visual Estimation in the  
50 485 Performance of MR-targeted Prostate Biopsy: The PROFUS Trial. Eur Urol 2013.  
51  
52  
53 486 24. PROstate MRI Imaging Study (PROMIS). Current Controlled Trials Web site.  
54 487 ISRCTN16082556/16082556. <http://www.controlled-trials.com/>  
55  
56 488

- 1  
2  
3 489 25. Department of Health. National Schedules of Reference Costs: financial year 2011 to  
4 490 2012. London, 2013.  
5  
6 491 26. de Rooij M, Crienen S, Witjes JA, et al. Cost-effectiveness of Magnetic Resonance (MR)  
7 492 Imaging and MR-guided Targeted Biopsy Versus Systematic Transrectal Ultrasound-  
8 493 Guided Biopsy in Diagnosing Prostate Cancer: A Modelling Study from a Health Care  
9 494 Perspective. *Eur Urol* 2013.  
10  
11 495 27. Willis S, Miners A, van der Meulen J. Re: de Rooij M, et al. Cost-effectiveness of Magnetic  
12 496 Resonance (MR) Imaging and MR-guided Targeted Biopsy Versus Systematic  
13 497 Transrectal Ultrasound-Guided Biopsy in Diagnosing Prostate Cancer: A Modelling  
14 498 Study from a Health Care Perspective. [eLetter]. *European Urology*, April 22 2014.  
15  
16 499 28. Bossuyt PM, Reitsma JB, Bruns DE, et al. The STARD statement for reporting studies of  
17 500 diagnostic accuracy: explanation and elaboration. *Ann Intern Med* 2003;**138**(1):W1-  
18 501 12.  
19  
20 502 29. Moore CM, Kasivisvanathan V, Eggener S, et al. Standards of Reporting for MRI-targeted  
21 503 Biopsy Studies (START) of the Prostate: Recommendations from an International  
22 504 Working Group. *European Urology* 2013;**64**(4):544-52.  
23  
24 505  
25  
26  
27  
28  
29 506  
30  
31  
32  
33  
34  
35  
36  
37  
38  
39  
40  
41  
42  
43  
44  
45  
46  
47  
48  
49  
50  
51  
52  
53  
54  
55  
56  
57  
58  
59  
60

1  
2  
3 507  
4  
5 508  
6  
7  
8  
9  
10  
11  
12  
13  
14  
15  
16  
17  
18  
19  
20  
21  
22  
23  
24  
25  
26  
27  
28  
29  
30  
31  
32  
33  
34  
35  
36  
37  
38  
39  
40  
41  
42  
43  
44  
45  
46  
47  
48  
49  
50  
51  
52  
53  
54  
55  
56  
57  
58  
59  
60

For peer review only

509 **Table 3**

510 Diagnostic accuracy estimates of TRUS-guided biopsy, mpMRI and MRI-targeted biopsy used  
 511 in the base case analysis

| Index Test          | Sensitivity                                                                  | Specificity                                                                                                                                             | Reference test                                                                                                                                 | Source and patient population                                                                                                                                                                                        |
|---------------------|------------------------------------------------------------------------------|---------------------------------------------------------------------------------------------------------------------------------------------------------|------------------------------------------------------------------------------------------------------------------------------------------------|----------------------------------------------------------------------------------------------------------------------------------------------------------------------------------------------------------------------|
| TRUS-guided biopsy  | <b>50%</b><br>(16/34 patients, 95% CIs: 27-73)<br>$\alpha = 25, \beta = 25$  | <b>90%</b><br>(57/62 patients, 95% CIs: 78-97)<br>$\alpha = 45, \beta = 5$                                                                              | Whole-mount pathology                                                                                                                          | Lecornet 2012 <sup>16</sup> : Simulated biopsy results on digitally reconstructed prostates of 96 men who had undergone surgery for bladder cancer which revealed prostate cancer.                                   |
| mpMRI               | <b>80%</b><br>(252/302, 95% CIs: 66-90)<br>$\alpha = 40, \beta = 5$          | <b>60%</b><br>(154/253 patients, 95% CIs: 45-76)<br>$\alpha = 30, \beta = 20$                                                                           | TRUS-guided extended systematic biopsies (10-12 core) plus two targeted biopsies for those with any area suspicious on mpMRI (score $\geq 3$ ) | Haffner 2011 <sup>17</sup> : 555 men with suspected localised prostate defined as raised PSA of >3-4ng/ml and/or abnormal DRE with no clinical or biological suspicion of stage T>3 or mets and had no prior biopsy. |
| MRI-targeted biopsy | <b>80%</b><br>(94/121 patients, 95% CIs: 66-90)<br>$\alpha = 40, \beta = 10$ | <b>90%</b><br><i>Assumed to be equivalent to the specificity of TRUS-guided biopsy,</i><br>(57/62 patients, 95% CIs: 78-97)<br>$\alpha = 45, \beta = 5$ | 20 sector-TPM                                                                                                                                  | Kasivisvanathan 2013 <sup>19</sup> : 182 men who had a suspicious lesion on mpMRI; 78 of whom were biopsy naive, 32 had a prior negative biopsy and 72 had a prior positive biopsy.                                  |

512

513 *TRUS – transrectal ultrasound, TPM- template mapping biopsy, mpMRI – multi-parametric*514 *magnetic resonance imaging, MRI-TB – MRI-targeted biopsy. Data inputs were rounded to*

515 the nearest 5%. Beta distributions were estimated using the integer form in Excel according  
 516 to the parameters  $\alpha$  and  $\beta$ .

517 **Table 4**

518 Details of calculations and results of the decision analysis for a cohort of 1000 men  
 519 comparing TRUS-guided biopsy with mpMRI and MRI-targeted biopsy.

|                                                                                                          | TRUS-guided biopsy                                                                                                                                  | mpMRI then MRI-targeted biopsy                                                                                                                                                                                                                                                                                                                   |
|----------------------------------------------------------------------------------------------------------|-----------------------------------------------------------------------------------------------------------------------------------------------------|--------------------------------------------------------------------------------------------------------------------------------------------------------------------------------------------------------------------------------------------------------------------------------------------------------------------------------------------------|
| No of biopsies                                                                                           | <b>1000</b><br>(all men)                                                                                                                            | <b>600</b><br>$= P(\text{MRI+}   \text{D+}) + P(\text{MRI+}   \text{D-})$<br>$= (\text{sensMRI} * \text{prev} * \text{no\_in\_cohort}) +$<br>$((1 - \text{specMRI}) * (1 - \text{prev}) * \text{no\_in\_cohort})$<br>$= (0.8 * 0.5 * 1000) + ((1 - 0.6) * (1 - 0.5) * 1000)$                                                                     |
| Patients with clinically significant cancer & correctly identified (True Positive)                       | <b>250</b><br>$= P(\text{TRUS+}   \text{D+})$<br>$= \text{sensTRUS} * \text{prev} * \text{no\_in\_cohort}$<br>$= 0.5 * 0.5 * 1000$                  | <b>320</b><br>$= P(\text{MRI+}   \text{D+}) * P(\text{MRITB+}   \text{D+})$<br>$= \text{sensMRI} * \text{sensMRITB} * \text{prev} * \text{no\_in\_cohort}$<br>$= 0.8 * 0.8 * 0.5 * 1000$                                                                                                                                                         |
| Patients with clinically significant cancer & wrongly identified (False Negative)                        | <b>250</b><br>$= P(\text{TRUS+}   \text{D-})$<br>$= (1 - \text{sensTRUS}) * \text{prev} * \text{no\_in\_cohort}$<br>$= (1 - 0.5) * 0.5 * 1000$      | <b>180</b><br>$= P(\text{MRI-}   \text{D+}) + P(\text{MRI+}   \text{D+}) * P(\text{MRITB-}   \text{D+})$<br>$= ((1 - \text{sensMRI}) * \text{prev} * \text{no\_in\_cohort}) +$<br>$(\text{sensMRI} * (1 - \text{sensMRITB}) * \text{prev} * \text{no\_in\_cohort})$<br>$= ((1 - 0.8) * 0.5 * 1000) + (0.8 * (1 - 0.8) * 0.5 * 1000)$             |
| Patients with insignificant prostate cancer or no prostate cancer & correctly identified (True Negative) | <b>450</b><br>$= P(\text{TRUS-}   \text{D-})$<br>$= \text{specTRUS} * (1 - \text{prev}) * \text{no\_in\_cohort}$<br>$= 0.9 * (1 - 0.5) * 1000$      | <b>480</b><br>$= P(\text{MRI-}   \text{D-}) + P(\text{MRI+}   \text{D-}) * P(\text{MRITB-}   \text{D-})$<br>$= (\text{specMRI} * (1 - \text{prev}) * \text{no\_in\_cohort}) +$<br>$((1 - \text{specMRI}) * \text{specMRITB} * (1 - \text{prev}) * \text{no\_in\_cohort})$<br>$= (0.6 * (1 - 0.5) * 1000) + ((1 - 0.6) * 0.9 * (1 - 0.5) * 1000)$ |
| Patients with insignificant prostate cancer or no prostate cancer & wrongly identified (False Positive)  | <b>50</b><br>$= P(\text{TRUS+}   \text{D-})$<br>$= (1 - \text{specTRUS}) * (1 - \text{prev}) * \text{no\_in\_cohort}$<br>$= (1 - 0.9) * 0.5 * 1000$ | <b>20</b><br>$= P(\text{MRI+}   \text{D-}) * P(\text{MRITB+}   \text{D-})$<br>$= (1 - \text{specMRI}) * (1 - \text{specMRITB}) * (1 - \text{prev}) * \text{no\_in\_cohort}$<br>$= (1 - 0.6) * (1 - 0.9) * (1 - 0.5) * 1000$                                                                                                                      |

520

521 'prev' – prevalence; 'no\_in\_cohort' – number of men in cohort; 'sensTRUS' – sensitivity of TRUS-guided biopsy;

522 'specTRUS' – specificity of TRUS-guided biopsy; 'sensMRI' – sensitivity of mpMRI; 'specMRI' – specificity of

523 mpMRI; 'sensMRITB' – sensitivity of MRI-targeted biopsy; 'specMRITB' – specificity of MRI-targeted biopsy.



524 **Table 3**

525 Results of sensitivity analyses in a cohort of 1000 men

| Scenario                                                                                                                   | Base case analysis        |                                          | Scenario i:<br>(mpMRI sensitivity<br>74%, specificity 88%) |                                          | Scenario ii:<br>(MRI-targeted<br>biopsy sensitivity<br>80%, specificity<br>80%) |                                             |
|----------------------------------------------------------------------------------------------------------------------------|---------------------------|------------------------------------------|------------------------------------------------------------|------------------------------------------|---------------------------------------------------------------------------------|---------------------------------------------|
|                                                                                                                            | TRUS-<br>guided<br>biopsy | mpMRI<br>then MRI-<br>targeted<br>biopsy | TRUS-<br>guided<br>biopsy                                  | mpMRI<br>then MRI-<br>targeted<br>biopsy | TRUS-<br>guided<br>biopsy                                                       | mpMRI<br>then<br>MRI-<br>targeted<br>biopsy |
| No of biopsies                                                                                                             | <b>1000</b>               | <b>600</b>                               | <b>1000</b>                                                | <b>430</b>                               | <b>1000</b>                                                                     | <b>600</b>                                  |
| Patients with<br>clinically significant<br>cancer & correctly<br>identified (True<br>Positive)                             | <b>250</b>                | <b>320</b>                               | <b>250</b>                                                 | <b>296</b>                               | <b>250</b>                                                                      | <b>320</b>                                  |
| Patients with<br>clinically significant<br>cancer & wrongly<br>identified (False<br>Negative)                              | <b>250</b>                | <b>180</b>                               | <b>250</b>                                                 | <b>204</b>                               | <b>250</b>                                                                      | <b>180</b>                                  |
| Patients with<br>insignificant<br>prostate cancer or<br>no prostate cancer<br>& correctly<br>identified (True<br>Negative) | <b>450</b>                | <b>480</b>                               | <b>450</b>                                                 | <b>494</b>                               | <b>450</b>                                                                      | <b>460</b>                                  |
| Patients with<br>insignificant<br>prostate cancer or<br>no prostate cancer<br>& wrongly<br>identified (False<br>Positive)  | <b>50</b>                 | <b>20</b>                                | <b>50</b>                                                  | <b>6</b>                                 | <b>50</b>                                                                       | <b>40</b>                                   |

526

527

1  
2  
3  
4  
5  
6  
7  
8  
9  
10  
11  
12  
13  
14  
15  
16  
17  
18  
19  
20  
21  
22  
23  
24  
25  
26  
27  
28  
29  
30  
31  
32  
33  
34  
35  
36  
37  
38  
39  
40  
41  
42  
43  
44  
45  
46  
47  
48  
49  
50  
51  
52  
53  
54  
55  
56  
57  
58  
59  
60

1 **Multi-parametric MRI followed by targeted prostate biopsy for men with suspected**  
2 **prostate cancer: a clinical decision analysis**

3 Sarah R Willis, Hashim U Ahmed, Caroline M Moore, Ian Donaldson, Mark Emberton, Alec H

4 Miners, Jan van der Meulen

5

6 Department of Health Services Research & Policy, London School of Hygiene & Tropical

7 Medicine, 15-17 Tavistock Place, London, WC1H 9SH.

8 Sarah R Willis, Research Fellow

9 Alec H Miners, Senior Lecturer

10 Jan van der Meulen, Professor of Clinical Epidemiology

11

12 Division of Surgery and Interventional Sciences, University College London, London UK and

13 Department of Urology, University College London Hospitals NHS Foundation Trust, London

14 Hashim U Ahmed, MRC Clinician Scientist

15 Caroline M Moore, Consultant Urologist

16 Ian Donaldson, Clinical Research Fellow

17 Mark Emberton, Director

18

19 Correspondence to: S Willis [sarah.willis@lshtm.ac.uk](mailto:sarah.willis@lshtm.ac.uk)

20 **Keywords:** biopsy; diagnosis; decision trees; magnetic resonance imaging; prostatic

21 neoplasms

22 **Word count of abstract:** 228

23 **Word count of text:** 3,175

1  
2  
3 24 **Note:** This publication presents independent research commissioned by the Health  
4  
5 25 Innovation Challenge Fund (HICF-T4-310), a parallel funding partnership between the  
6  
7 26 Wellcome Trust and the Department of Health. The views expressed in this publication are  
8  
9 27 those of the authors and not necessarily those of the Wellcome Trust or the Department of  
10  
11 28 Health.  
12  
13  
14  
15  
16

17 30 The Corresponding Author, Ms Sarah Willis, has the right to grant on behalf of all authors  
18  
19 31 and does grant on behalf of all authors, an exclusive licence (or non exclusive for  
20  
21 32 government employees) on a worldwide basis to the BMJ Publishing Group Ltd to permit  
22  
23 33 this article (if accepted) to be published in BMJ editions and any other BMJPGJL products and  
24  
25 34 sublicences such use and exploit all subsidiary rights, as set out in our licence.  
26  
27  
28  
29

30  
31 36 All authors have completed the ICMJE uniform disclosure  
32  
33 37 at [www.icmje.org/coi\\_disclosure.pdf](http://www.icmje.org/coi_disclosure.pdf) and declare: financial support for the submitted work  
34  
35 38 from the Wellcome Trust and the Department of Health (for all authors); Prof. Mark  
36  
37 39 Emberton is a consultant/investigator for USHIFU, STEBA Biotech, Sanofi Aventis,  
38  
39 40 GlaxoSmithKline and Angiodynamics, is a consultant for Sophiris and is a director of  
40  
41 41 Mediwatch PLC. Mr. Hashim Ahmed is an investigator for USHIFU, Angiodynamics and  
42  
43 42 Advanced Medical Diagnostics (AMD). Ms. Caroline Moore has received research grants  
44  
45 43 from GlaxoSmithKline, the Wellcome Trust and Advanced Medical Diagnostics (AMD), is a  
46  
47 44 consultant/investigator for STEBA Biotech and has been paid for lecturing by Sanofi. Prof.  
48  
49 45 Jan vanderMeulen, Dr. Alec Miners and Ms. Sarah Willis have no other interests to disclose.  
50  
51  
52  
53  
54

55 46  
56  
57  
58  
59  
60

1  
2  
3  
4  
5  
6  
7  
8  
9  
10  
11  
12  
13  
14  
15  
16  
17  
18  
19  
20  
21  
22  
23  
24  
25  
26  
27  
28  
29  
30  
31  
32  
33  
34  
35  
36  
37  
38  
39  
40  
41  
42  
43  
44  
45  
46  
47  
48  
49  
50  
51  
52  
53  
54  
55  
56  
57  
58  
59  
60

47 Ethical approval was not required for this study. The data inputs, the decision tree structure  
48 and the calculations are given in full so no additional data are available.

For peer review only

1  
2  
3 49 **ABSTRACT (228 words)**  
4  
5  
6

7  
8 51 **Objective:** To compare the diagnostic outcomes of the current approach of TRUS-guided  
9  
10 52 biopsy in men with suspected prostate cancer to an alternative approach using  
11  
12 53 multiparametric MRI (mpMRI), followed by MRI-targeted biopsy if positive.

14 54 **Design:** Clinical decision analysis was used to synthesise data from recently emerging  
15  
16 55 evidence in a format that is relevant for clinical decision making.  
17  
18

19 56 **Population:** A hypothetical cohort of 1000 men with suspected prostate cancer.  
20  
21

22 57 **Interventions:** mpMRI and if positive MRI-targeted biopsy compared to TRUS-guided biopsy  
23  
24 58 in all men.  
25

26 59 **Outcome measures:** We report the number of men expected to undergo a biopsy as well as  
27  
28 60 the numbers of correctly identified patients with or without prostate cancer. A probabilistic  
29  
30 61 sensitivity analysis was carried out using Monte Carlo simulation to explore the impact of  
31  
32 62 statistical uncertainty in the diagnostic parameters.  
33  
34

35 63 **Results:** In 1000 men, mpMRI followed by MRI-targeted biopsy “clinically dominates” TRUS-  
36  
37 64 guided biopsy as it results in fewer expected biopsies (600 versus 1000), more men being  
38  
39 65 correctly identified as having clinically significant cancer (320 versus 250), and fewer men  
40  
41 66 being falsely identified (20 versus 50). The mpMRI-based strategy dominated TRUS-guided  
42  
43 67 biopsy in 86% of the simulations in the probabilistic sensitivity analysis.  
44  
45  
46

47 68 **Conclusions:** Our analysis suggests that mpMRI followed by MRI-targeted biopsy is likely to  
48  
49 69 result in fewer and better biopsies than TRUS-guided biopsy. Future research in prostate  
50  
51 70 cancer should focus on providing precise estimates of key diagnostic parameters.  
52  
53  
54

55 71  
56  
57  
58  
59  
60

1  
2  
3 72 **STRENGTHS AND LIMITATIONS OF THE STUDY (132 words)**  
4

- 5 73 • There are no clinical studies that directly compare the standard diagnostic approach  
6 using TRUS-guided biopsy in all men with suspected prostate cancer with an approach  
7 74 where mpMRI is used to select men for biopsy and to guide the biopsy needle towards  
8 a suspicious lesion against an accepted gold standard.  
9 75  
10 76  
11  
12  
13 77 • Our decision analysis brings together emerging evidence on the diagnostic accuracy of  
14 TRUS-guided biopsy, mpMRI and MRI-targeted biopsies.  
15 78  
16  
17  
18 79 • A probabilistic sensitivity analysis demonstrates that the mpMRI-based strategy was  
19 most effective in 86% of the simulations. However this sensitivity analysis did not assess  
20 80 the impact of structural uncertainties.  
21 81  
22  
23  
24 82 • This analysis focuses purely on short term clinical outcomes following different testing  
25 options. Ultimately, the optimal diagnostic strategy for men with suspected prostate  
26 83 cancer will depend on the impact on both costs and quality-adjusted life expectancy.  
27 84  
28  
29  
30 85

1  
2  
3 86 **INTRODUCTION**  
4  
5  
6  
7

87

88 Prostate cancer is the most common male cancer in most developed countries. Incidence  
89 rates have risen rapidly over the past 15 years, in part due to the increase in prostate  
90 specific antigen (PSA) testing. The use of PSA testing remains controversial as it lacks both  
91 sensitivity and specificity for the detection of prostate cancer.<sup>1,2</sup> Despite the high incidence,  
92 many men diagnosed with prostate cancer will not die from the disease so it is accepted  
93 that a distinction should be made between prostate cancer that is unlikely to cause harm  
94 (“clinically insignificant” disease) and cancer which, if untreated, may negatively impact  
95 quality of life or lead to death (“clinically significant” disease). Whilst there is currently no  
96 agreed threshold of significance, most commentators agree that clinically significant disease  
97 should be declared when disease exceeds a certain volume or is populated by histological  
98 patterns that exhibit poor differentiation (Gleason score).<sup>3-5</sup>  
99

100

101 The optimal strategy for diagnosing clinically significant prostate cancer is the focus of a  
102 rapidly developing body of research. The standard diagnostic approach for men with  
103 suspected prostate cancer is to offer them a transrectal ultrasound (TRUS)-guided prostate  
104 biopsy taking 10 to 12 cores.<sup>6-8</sup> The ultrasound guidance ensures the biopsy needles are  
105 guided to zones within the gland which are considered to have an equal probability of  
106 harbouring disease. An alternative to this is to identify areas of the prostate that are more  
107 likely to contain cancer, and to sample from these during biopsy. The test that is currently  
108 gaining most favour in conferring this information is multi-parametric MRI (mpMRI).<sup>9</sup>

109

1  
2  
3 109 An MRI-based approach to diagnosis would require all men with raised PSA to have an  
4  
5 110 mpMRI. Men who are negative on mpMRI would receive no further biopsy. The men with a  
6  
7 111 suspicious lesion on mpMRI would undergo an MRI-targeted biopsy. During MRI-targeted  
8  
9 112 biopsy, the biopsy needle can be directed by the clinician using prior mpMR images and  
10  
11 113 real-time ultrasound (“visual or cognitive registration”), by using assistive technology that  
12  
13 114 digitally overlays the target information derived from the mpMRI directly onto the  
14  
15 115 ultrasound image (“computer-aided registration” or “image fusion”) or the biopsy can be  
16  
17 116 performed within the MR scanner itself (“in-bore biopsy” or “MR-guided MR biopsy”).  
18  
19 117 Irrespective of the image-guided technique, an mpMRI-based approach to diagnosis has  
20  
21 118 three potential advantages. First, patients with no lesion on mpMRI could avoid a prostate  
22  
23 119 biopsy. Second, patients with clinically insignificant disease would avoid diagnosis and  
24  
25 120 subsequent inappropriate treatment which carries risk of side-effects and no benefit in  
26  
27 121 terms of survival. Third, using mpMRI for targeting may improve the detection of clinically  
28  
29 122 significant cancers and improve risk stratification.  
30  
31  
32  
33  
34  
35  
36  
37

38 124 The UK’s National Institute of Health and Care Excellence (NICE) has recently acknowledged  
39  
40 125 the utility of mpMRI, but stopped short of a recommendation to offer pre-biopsy mpMRI to  
41  
42 126 all men.<sup>7</sup> It remains controversial partly due to doubts about the performance and  
43  
44 127 reproducibility of mpMRI. Despite this, many providers have adopted an image-guided  
45  
46 128 biopsy approach in response to a man presenting with an elevated PSA.<sup>10</sup>  
47  
48  
49  
50  
51

52 130 We summarise what can be understood from recently emerging evidence in a format that is  
53  
54 131 relevant for clinical decision making. We carried out a decision analysis to compare a  
55  
56  
57  
58  
59  
60



1  
2  
3 132 simplified version of the current standard diagnostic approach (TRUS-guided biopsy) with an  
4  
5 133 approach where mpMRI is used to select men for biopsy and to guide the biopsy needle  
6  
7 134 towards the area of suspected cancer. We estimate the number of biopsies that could be  
8  
9  
10 135 avoided with pre-biopsy mpMRI and the number of correctly identified patients with and  
11  
12 136 without clinically significant prostate cancer.  
13

14  
15 137  
16  
17  
18  
19  
20  
21  
22  
23  
24  
25  
26  
27  
28  
29  
30  
31  
32  
33  
34  
35  
36  
37  
38  
39  
40  
41  
42  
43  
44  
45  
46  
47  
48  
49  
50  
51  
52  
53  
54  
55  
56  
57  
58  
59  
60

For peer review only

1  
2  
3 138 **METHODS**  
4  
5  
6 139

7  
8 140 *Decision analysis*  
9

10 141 We used a decision tree to compare the standard diagnostic pathway (TRUS-guided biopsy  
11  
12 142 for all) with a new pathway (mpMRI for all, then MRI-targeted biopsy if positive). The tree,  
13  
14  
15 143 presented in Figure 1, was evaluated to reveal the expected outcomes associated with each  
16  
17 144 option, for a hypothetical cohort of 1000 men by multiplying the prevalence estimates of  
18  
19  
20 145 our target condition by sensitivity and specificity estimates of the diagnostic tests. The test  
21  
22 146 accuracy estimates used to populate the decision tree were derived from recent studies  
23  
24 147 which reported data that reflected the conditional nature of the parameters and used an  
25  
26 148 appropriate reference test.<sup>11 12</sup> All of these data are limited in some way, but assumptions  
27  
28  
29 149 were made so that any biases would favour the current diagnostic approach.  
30  
31  
32 150

33  
34 151 *Target population*  
35

36 152 The target population for the decision analysis was men with increased serum PSA levels or  
37  
38 153 abnormal findings on digital rectal examination who had never had a prostate biopsy.  
39  
40  
41 154

42  
43 155 *Clinically significant disease*  
44

45 156 For our base-case analysis we defined clinically significant disease according to widely used,  
46  
47 157 and arguably somewhat conservative, criteria: a minimum volume of 0.2cc or cell  
48  
49  
50 158 differentiation corresponding to a Gleason score of 3+4 or higher.<sup>13</sup> The prevalence of  
51  
52  
53 159 clinically significant disease in our target population is uncertain, but we estimated it to be  
54  
55 160 50% of all men with suspected prostate cancer, based on a prospective analysis of men  
56  
57  
58  
59  
60

1  
2  
3 161 undergoing a first prostate biopsy.<sup>14</sup> The remaining 50% are assumed to have clinically  
4  
5 162 insignificant disease or no cancer. We varied the prevalence of clinically significant disease  
6  
7  
8 163 in a sensitivity analysis.  
9

10 164

### 11 165 *TRUS-guided biopsy*

12  
13  
14  
15 166 The gold standard used to establish the presence or absence of clinically significant disease -  
16  
17 167 whole-mount pathological data - is usually only available for men who test positive and then  
18  
19 168 go on to have radical surgery.<sup>7 11 15</sup> Therefore we used data from a study which carried out  
20  
21 169 computer simulations to estimate the performance characteristics of TRUS-guided biopsy by  
22  
23 170 comparing them to reconstructed whole-mount pathology obtained from patients  
24  
25 171 undergoing surgery for bladder cancer, which revealed they also had prostate cancer.<sup>16</sup> The  
26  
27 172 spectrum of disease in this sample population is likely to include more early-stage disease  
28  
29 173 than would be expected in an unscreened UK population, and thus this bias will favour the  
30  
31 174 current diagnostic approach.  
32  
33  
34

35 175

36  
37  
38 176 The sensitivity of TRUS-guided biopsy, when criteria proposed by Epstein were used to  
39  
40 177 interpret the diagnostic result, was approximately 50%.<sup>16</sup> According to Epstein, a biopsy  
41  
42 178 result is positive for significant cancer if the maximum cancer core length from biopsy is at  
43  
44 179 least 3mm or if the Gleason score is 3+4 or higher.<sup>13</sup> The corresponding specificity of TRUS-  
45  
46 180 guided biopsy was estimated to be approximately 90%, which represents the proportion of  
47  
48 181 men correctly identified with insignificant disease (men with no prostate cancer were not  
49  
50 182 included in the Lecornet et al. study population).<sup>16</sup>  
51  
52  
53

54 183  
55  
56  
57  
58  
59  
60

184

185 *mpMRI and MRI-targeted biopsy*186 We estimated the diagnostic accuracy of the MRI-based strategy by combining the **test**187 **accuracy** estimates for mpMRI and MRI-targeted biopsy. A recent systematic review of the

188 literature revealed two studies on mpMRI in biopsy-naïve men with suspected prostate

189 cancer.<sup>11 17 18</sup> **Only one of these studies reported data at the level of detail required to**190 **estimate sensitivity and specificity of mpMRI:** a large study involving 555 men which

191 compared pre-biopsy mpMRI results with TRUS-guided biopsy and/or MRI-targeted biopsy

192 as a proxy for true disease status.<sup>17</sup> We used these data to estimate the sensitivity of

193 mpMRI at 80% and the specificity, 60%. A more recent study shows these values may in

194 fact underestimate the performance of mpMRI.<sup>14</sup>

195

196 The accuracy of MRI-targeted biopsy was taken from a study that compared MRI-targeted

197 biopsy with cognitive registration to 20-sector template-prostate mapping.<sup>19</sup> This study was

198 used since all men in the study population had a lesion on mpMRI and therefore allowed us

199 to capture the sequential nature of the diagnostic approach. The study showed that when

200 the biopsies were classified according to the Epstein criteria, the sensitivity was

201 approximately 80% and the specificity 80%.<sup>19</sup> The specificity that this study reported for the

202 MRI-targeted biopsy is lower than our estimate of the specificity of TRUS-guided biopsy

203 **(90%).<sup>19</sup>** However, the use of MRI-targeting instead of TRUS-guided biopsy should have no

204 impact on men without clinically significant disease, and therefore we assumed that MRI-

205 targeted biopsy should be as good as – but not better than – TRUS-guided biopsy at

206 correctly identifying men without clinically significant prostate cancer. We therefore **used**

1  
2  
3 207 90% as the specificity estimate for MRI-targeted biopsy in the decision analysis, the same as  
4  
5 208 that of TRUS-guided biopsy. We assessed the impact this had on the overall diagnostic  
6  
7 209 results in a sensitivity analysis.  
8  
9

10 210

### 11 211 *Sensitivity Analysis*

12  
13  
14 212 We carried out a one-way sensitivity analysis by varying the prevalence of clinically  
15  
16  
17 213 significant disease from 0 to 1, keeping all other variables constant. This sensitivity analysis  
18  
19 214 was intended to demonstrate the extent to which the optimal diagnostic strategy depends  
20  
21  
22 215 on the prevalence of clinically significant disease. We also carried out two sensitivity  
23  
24 216 analyses to assess the impact of specific test performance estimates of the mpMRI-based  
25  
26 217 strategy on overall diagnostic outcomes. In the first scenario (scenario i) we used a pooled  
27  
28 218 estimate of mpMRI test performance from a recent meta-analysis (mpMRI sensitivity 74%,  
29  
30 219 mpMRI specificity 88%).<sup>20</sup> In the second scenario (scenario ii) we investigated the impact of  
31  
32  
33 220 our assumption that MRI-targeting has no impact on men without clinically significant  
34  
35 221 disease (by using a specificity of 80% for MRI-targeted biopsy as reported by  
36  
37 222 Kasivisvanathan and colleagues rather than our base case estimate of 90%).<sup>19</sup>  
38  
39

40 223

41  
42  
43 224 Although these sensitivity analyses provide some insight into the specific impact of  
44  
45 225 individual parameters, the estimates used to describe the performance of all the diagnostic  
46  
47 226 tests are associated with significant uncertainties. Therefore, to assess the robustness of our  
48  
49 227 results, we performed a probabilistic sensitivity analysis using Monte Carlo simulation  
50  
51  
52 228 varying the sensitivities and specificities of the three tests (TRUS-guided biopsy, mpMRI, and  
53  
54 229 MRI-targeted biopsy) simultaneously over 2000 iterations, sampling from beta distributions  
55  
56  
57  
58  
59  
60

1  
2  
3 230 to characterise the uncertainty in the test accuracy data (see table 1). We determined the  
4  
5 231 beta distributions by assuming that the sensitivities and specificities were observed in  
6  
7 232 populations consisting of 50 men with and 50 men without clinically significant disease. We  
8  
9  
10 233 substantially widened the distributions (by assuming a small population of men) in order to  
11  
12 234 increase the uncertainty associated with the test performance parameters. We ignored the  
13  
14  
15 235 correlation between sensitivity and specificity and kept the disease prevalence constant at  
16  
17 236 50%.

18  
19  
20 237

21  
22 238

23  
24 239  
25  
26  
27  
28  
29  
30  
31  
32  
33  
34  
35  
36  
37  
38  
39  
40  
41  
42  
43  
44  
45  
46  
47  
48  
49  
50  
51  
52  
53  
54  
55  
56  
57  
58  
59  
60

1  
2  
3 240 **RESULTS**  
4

5 241  
6

7 242 The decision tree **estimated** that the use of TRUS-guided biopsy in a hypothetical cohort of  
8  
9  
10 243 1000 men with suspected prostate cancer – **and an estimated 50% prevalence of clinically**  
11  
12 244 **significant disease** – would result in 300 positive and 700 negative biopsy results, which  
13  
14 245 would correctly identify 250 men with clinically significant prostate cancer and 450 men  
15  
16 246 without the disease (Table 2). **It follows that 250 men with significant prostate cancer would**  
17  
18 247 **be missed by TRUS-guided biopsy and 50 men who do not have significant prostate cancer**  
19  
20  
21 248 **would wrongly receive a diagnosis.**  
22  
23

24 249

25  
26 250 The use of mpMRI and MRI-targeted biopsy in the same cohort would result in 600 men  
27  
28 251 undergoing a **prostate** biopsy with 340 positive and 260 negative biopsy results (Table 2).  
29  
30 252 This strategy would correctly identify 320 men as having significant prostate cancer and 480  
31  
32 253 without the disease. **In other words, the use of the mpMRI-based strategy would fail to**  
33  
34 254 **diagnose significant cancer in 180 men (= 500 - 320), which is the result of significant**  
35  
36 255 **prostate cancer that were missed by mpMRI in addition to significant cancers that were**  
37  
38 256 **identified on the mpMRI but were missed by MRI-targeted biopsy. 20 men (= 500 - 480) who**  
39  
40 257 **do not have clinically significant prostate cancer would wrongly receive a diagnosis.**  
41  
42  
43  
44

45 258

46  
47 259 Multi-parametric MRI followed by MRI-targeted biopsy can be said to “clinically dominate”  
48  
49 260 TRUS-guided biopsy as it results in fewer expected biopsies (600 versus 1000), more men  
50  
51 261 being correctly identified as having clinically significant disease (320 versus 250), and fewer  
52  
53 262 men being falsely identified with the disease (20 versus 50).  
54  
55  
56  
57  
58  
59  
60

263

Figure 2 provides a visual representation of the one-way sensitivity analysis showing the total number of people receiving the wrong diagnosis (the sum of the number of patients with a false-positive or a false-negative result) as a function of the prevalence of clinically significant disease. The mpMRI-based approach resulted in a lower number of patients wrongly diagnosed than with TRUS-guided biopsy for all men, at all prevalence rates. Below a prevalence of 5%, doing nothing is the “optimal” strategy as it leads to the lowest number of men with the wrong diagnosis. Above a prevalence of 70%, treating all men is optimal.

271

Table 3 demonstrates that assuming a sensitivity of 74% and a specificity of 88% as estimates of the test performance of mpMRI (instead of a sensitivity of 80% and a specificity of 60% used in the base case analysis) found that the mpMRI-based strategy resulted in far fewer biopsies than our base case estimation (430 instead of 600), but slightly worse diagnostic outcomes for men with significant disease (296 correctly identified instead of 320), which was still better than the current standard of care (250 correctly identified).

Table 3 also shows that using a lower specificity for MRI-targeted biopsy (80% instead of 90%) resulted in 40 men (instead of 20) without clinically significant disease wrongly identified as having significant cancer, but this is still less than the 50 men that would be wrongly identified using the standard diagnostic approach using TRUS-guided biopsy alone.

282

When the sensitivities and specificities of the three tests were varied simultaneously in 2000 simulations for the probabilistic sensitivity analysis, the diagnostic approach using mpMRI and MRI-targeted biopsy clinically dominated in 86% of the simulations, whereas TRUS-



1  
2  
3 286 guided biopsy dominated in 0.8% of the simulations. Within the remaining 13.2% of  
4  
5 287 simulations, the choice between the mpMRI-based strategy and TRUS-guided biopsy is not  
6  
7  
8 288 clear as there was a 'trade-off' between outcomes. That is, either the mpMRI-based strategy  
9  
10 289 correctly identified more men with clinically significant cancer but fewer men without  
11  
12 290 clinically significant disease than TRUS-guided biopsy, or vice-versa.  
13  
14  
15 291

For peer review only

292 **DISCUSSION**

293

294 Our decision analysis suggests that mpMRI of the prostate followed by MRI-targeted biopsy  
295 if positive could result in fewer and better biopsies than a strategy using only TRUS-guided  
296 biopsy. The results suggest that the mpMRI-based strategy could reduce the number of  
297 biopsies by about one third (600 compared to 1000 biopsies), increase the number of men  
298 identified with clinically significant cancer by about 30% (320 compared to 250 patients),  
299 and reduce the number of men falsely identified with the disease by 60% (20 compared to  
300 50). These results are in line with those of recent clinical studies comparing similar  
301 strategies, albeit not against a gold standard of pathology or template biopsy.<sup>21 22</sup>

302

303 When we accounted for uncertainty in the sensitivity and specificity estimates of the three  
304 diagnostic tests, we found that the dominance of the mpMRI-based strategy was robust.  
305 However, the probabilistic sensitivity analysis did not assess the impact of inherent  
306 “structural” uncertainties, such as the ongoing debate about the definition of clinically  
307 significant cancer, various diagnostic thresholds used to decide whether mpMRI or biopsy  
308 results are positive or negative, and the use of imperfect gold-standard tests.

309

310 The National Institute for Health and Care Excellence (NICE), has recently updated its  
311 guidance on the diagnosis and management of men with prostate cancer.<sup>7</sup> Our estimate of  
312 the sensitivity of 50% for TRUS-guided biopsy is close to the estimate of 45% used in its  
313 analysis.<sup>7</sup> However, we estimated the specificity of the TRUS-guided biopsy to be 90%,  
314 whilst NICE assumed it to be 100%. While both of these specificity estimates are somewhat

1  
2  
3 315 speculative, we believed that the specificity estimate needed to reflect that patients who  
4  
5 316 have clinically insignificant prostate cancer may have biopsy results that are interpreted as  
6  
7 317 suggestive of clinically significant cancer. We also assumed that this “error” is as likely with  
8  
9 318 TRUS-guided as with MRI-targeted biopsies and therefore we used the same false-positive  
10  
11 319 rate for TRUS-guided and for MRI-targeted biopsies. These choices were made deliberately  
12  
13 320 in order to underestimate the comparative effectiveness of the proposed diagnostic  
14  
15 321 strategy using mpMRI. In addition we used data on the test accuracy of MRI-targeted biopsy  
16  
17 322 from a study which used visual registration techniques. It has been suggested that  
18  
19 323 computer-aided registration techniques may be more accurate,<sup>7</sup> although recent RCT data  
20  
21 324 showed no statistically significant difference in detection rates.<sup>23</sup>  
22  
23  
24  
25  
26  
27  
28

29 326 The results of our analysis are based on a simplification of the choices facing urologists in  
30  
31 327 the diagnosis of prostate cancer. In their evaluation, NICE considered a strategy of mpMRI  
32  
33 328 and biopsy for all men, including targeted biopsies for all men with a lesion on mpMRI. This  
34  
35 329 perhaps highlights the reticence of health care professionals to do ‘less’ rather than ‘more’,  
36  
37 330 which may be influenced by concern over medical liability. A major challenge therefore will  
38  
39 331 be the implementation of a strategy that requires a negative diagnostic test result to be  
40  
41 332 established and then followed by no immediate further investigation. New guidelines based  
42  
43 333 on the results of forthcoming randomised controlled trials (such as PROMIS) and expert  
44  
45 334 consensus may be required to avoid a “creep” in the numbers of unnecessary biopsies.<sup>24</sup>  
46  
47  
48  
49  
50  
51

52 336 In this analysis we focussed purely on short term clinical outcomes following different  
53  
54 337 testing options. Ultimately however the optimal diagnostic strategy for men with suspected  
55  
56  
57  
58  
59  
60

1  
2  
3 338 prostate cancer will depend on the impact on both costs and quality-adjusted life  
4  
5 339 expectancy. The cost of the diagnostic procedures may in fact be about the same for the  
6  
7  
8 340 two diagnostic strategies. If all men receive an mpMRI (£200 in 2011-12 UK NHS prices) and  
9  
10 341 60% of these men also receive a biopsy (£540 in 2011-12 UK NHS prices) the mpMRI-based  
11  
12 342 strategy will result in an average cost of £524 per man, assuming TRUS-guided biopsy and  
13  
14  
15 343 MRI-targeted biopsy are equivalent in cost.<sup>25</sup> This compares to £540 per man with TRUS-  
16  
17 344 guided biopsy. Of course the true costs of the two strategies include the long term costs and  
18  
19 345 consequences of further investigations and treatments which need to be taken into account  
20  
21  
22 346 in future economic modelling. Initial estimates from a published economic evaluation  
23  
24 347 suggest a mpMRI-based strategy is likely to be highly cost-effective in the Netherlands<sup>26</sup>  
25  
26 348 although uncertainties, particularly around long term health outcomes, remain.<sup>27</sup>  
27  
28  
29 349  
30  
31 350 Despite the complexity of the downstream pathways, estimates of diagnostic performance  
32  
33 351 and disease prevalence will be key drivers of the clinical and cost effectiveness of the whole  
34  
35 352 of prostate cancer care. Systematic reviews of the prostate biopsy and imaging literature  
36  
37 353 have revealed a large number of small studies characterised by poor reporting and  
38  
39 354 important biases.<sup>7 11 12 15</sup> In our analysis we only used very recently published studies that  
40  
41 355 capture the emerging evidence on how well TRUS-guided biopsy, mpMRI and MRI-targeted  
42  
43 356 biopsy perform and estimate disease prevalence. Future research efforts in prostate cancer  
44  
45 357 need to focus on providing accurate and precise estimates of these parameters. Studies  
46  
47 358 need to consistently distinguish between significant and insignificant cancer, represent the  
48  
49 359 sequential nature of diagnostic tests and should adhere to high standards of reporting such  
50  
51 360 as the START guidelines for MRI.<sup>28 29</sup> Without these studies, it will be hard to accurately  
52  
53  
54  
55  
56  
57  
58  
59  
60

1  
2  
3 361 evaluate the role of targeted biopsy or any new strategy for diagnosing prostate cancer in

4  
5 362 future.

6  
7  
8 363  
9  
10  
11  
12  
13  
14  
15  
16  
17  
18  
19  
20  
21  
22  
23  
24  
25  
26  
27  
28  
29  
30  
31  
32  
33  
34  
35  
36  
37  
38  
39  
40  
41  
42  
43  
44  
45  
46  
47  
48  
49  
50  
51  
52  
53  
54  
55  
56  
57  
58  
59  
60

For peer review only

1  
2  
3 364 **CONCLUSIONS**

4 365

5 366 Our analysis suggests that mpMRI followed by MRI-targeted biopsy may result in fewer and

6  
7 367 better biopsies than TRUS-guided biopsy. We found that the mpMRI-based strategy

8  
9 368 correctly identified more men with significant prostate cancer and correctly identified more

10  
11 369 men without the disease in 86% of the simulations in our probabilistic sensitivity analysis.

12  
13 370 Estimates of disease prevalence and diagnostic performance will be key drivers of a full

14  
15 371 economic analysis, so research efforts should focus on providing precise estimates of these

16  
17 372 crucial parameters.  
18  
19  
20  
21  
22  
23  
24  
25  
26  
27  
28  
29  
30  
31  
32  
33  
34  
35  
36  
37  
38  
39  
40  
41  
42  
43  
44  
45  
46  
47  
48  
49  
50  
51  
52  
53  
54  
55  
56  
57  
58  
59  
60

1  
2  
3 373 **AUTHOR CONTRIBUTIONS**  
4

5 374 JvdM, SW, AM, HA, ME made substantial contributions to the conception and design of the  
6  
7 375 work; SW, HA, CM and ID acquired the data; SW, JvdM, HA, CM and ID analysed and  
8  
9 376 interpreted the data; SW and JvdM drafted the work and HA, CM, ID, ME, AM provided  
10  
11 377 critical revision of the manuscript; ME, HA, CM, JvdM, SW and AM obtained funding and  
12  
13 378 JvdM and AM provided supervision. All authors have read and approved the final  
14  
15 379 manuscript and agree to be accountable for all aspects of the work.  
16  
17  
18  
19

20 380

21  
22 381 **ACKNOWLEDGEMENTS**  
23

24 382 The authors would like to thank Yipeng Hu and Veeru Kasivisvanathan for their assistance in  
25  
26 383 providing additional data for the analysis. We also acknowledge the research support Mark  
27  
28 384 Emberton receives from the United Kingdom's National Institute of Health Research  
29  
30 385 UCL/UCLH Biomedical Research Centre, London.  
31  
32

33 386

34  
35  
36 387 This publication presents independent research commissioned by the Health Innovation  
37  
38 388 Challenge Fund (HICF-T4-310), a parallel funding partnership between the Wellcome Trust  
39  
40 389 and the Department of Health. The views expressed in this publication are those of the  
41  
42 390 authors and not necessarily those of the Wellcome Trust or the Department of Health.  
43  
44

45 391

46  
47  
48 392  
49  
50  
51  
52  
53  
54  
55  
56  
57  
58  
59  
60

1  
2  
3 393 **DATA SHARING STATEMENT**

4  
5 394 The data inputs, the decision tree structure and the calculations are given in full so no  
6  
7 395 additional data are available.  
8  
9

10 396

11  
12 397 **FIGURE LEGENDS**

13  
14  
15 398 **Figure 1: Structure of the decision tree**

16  
17 399 **Figure 2: One-way sensitivity analysis showing the expected number of patients with wrong**  
18  
19 400 diagnoses according to the prevalence of clinically significant disease in a cohort of 1000  
20  
21 401 men. See text for further explanation.  
22

23  
24 402 **Table 1: Diagnostic accuracy estimates of TRUS-guided biopsy, mpMRI and MRI-targeted**

25  
26 403 biopsy used in the base case analysis. *TRUS – transrectal ultrasound, TPM- template*

27  
28 404 *mapping biopsy, mpMRI – multi-parametric magnetic resonance imaging, MRI-TB – MRI-*

29  
30 405 *targeted biopsy. Data inputs were rounded to the nearest 5%. Beta distributions were*

31  
32 406 *estimated using the integer form in Excel according to the parameters  $\alpha$  and  $\beta$ .*

33  
34 407 **Table 2: Details of calculations and** results of the decision analysis for a cohort of 1000 men

35  
36 408 comparing TRUS-guided biopsy with mpMRI and MRI-targeted biopsy. *'prev' – prevalence;*

37  
38 409 *'no\_in\_cohort' – number of men in cohort; 'sensTRUS' – sensitivity of TRUS-guided biopsy; 'specTRUS' –*

39  
40 410 *specificity of TRUS-guided biopsy; 'sensMRI' – sensitivity of mpMRI; 'specMRI' – specificity of mpMRI;*

41  
42 411 *'sensMRITB' – sensitivity of MRI-targeted biopsy; 'specMRITB' – specificity of MRI-targeted biopsy.*

43  
44 412 **Table 3: Results of sensitivity analyses in a cohort of 1000 men**

45  
46 413

47  
48 414

49  
50

51  
52

53  
54

55  
56

57  
58

59  
60



## 415 REFERENCES

- 416
- 417 1. Wolf AM, Wender RC, Etzioni RB, et al. American Cancer Society guideline for the early  
418 detection of prostate cancer: update 2010. *CA Cancer J Clin* 2010;**60**(2):70-98.
- 419 2. Esserman L, Shieh Y, Thompson I. Rethinking screening for breast cancer and prostate  
420 cancer. *JAMA* 2009;**302**(15):1685-92.
- 421 3. Ahmed HU, Hu Y, Carter T, et al. Characterizing clinically significant prostate cancer using  
422 template prostate mapping biopsy. *J Urol* 2011;**186**(2):458-64.
- 423 4. Stamey TA, Freiha FS, McNeal JE, et al. Localized prostate cancer. Relationship of tumor  
424 volume to clinical significance for treatment of prostate cancer. *Cancer* 1993;**71**(3  
425 Suppl):933-8.
- 426 5. Goto Y, Ohori M, Arakawa A, et al. Distinguishing clinically important from unimportant  
427 prostate cancers before treatment: value of systematic biopsies. *J Urol*  
428 1996;**156**(3):1059-63.
- 429 6. Heidenreich A, Bastian PJ, Bellmunt J, et al. EAU guidelines on prostate cancer. part 1:  
430 screening, diagnosis, and local treatment with curative intent-update 2013. *Eur Urol*  
431 2014;**65**(1):124-37.
- 432 7. National Institute for Health and Care Excellence. Prostate cancer: diagnosis and  
433 treatment (CG 175). London, 2014.
- 434 8. Prostate Cancer Risk Management Programme. Undertaking a transrectal ultrasound  
435 guided biopsy of the prostate. 2006.  
436 [www.cancerscreening.nhs.uk/prostate/pcrmp01.pdf](http://www.cancerscreening.nhs.uk/prostate/pcrmp01.pdf).
- 437 9. Lee DJ, Ahmed HU, Moore CM, et al. Multiparametric magnetic resonance imaging in the  
438 management and diagnosis of prostate cancer: current applications and strategies.  
439 *Curr Urol Rep* 2014;**15**(3):390.
- 440 10. Emberton M. Has magnetic resonance-guided biopsy of the prostate become the  
441 standard of care? *Eur Urol* 2013;**64**(5):720-1.
- 442 11. Moore CM, Robertson NL, Arsanious N, et al. Image-guided prostate biopsy using  
443 magnetic resonance imaging-derived targets: a systematic review. *Eur Urol*  
444 2013;**63**(1):125-40.
- 445 12. Mowatt G, Scotland G, Boachie C, et al. The diagnostic accuracy and cost-effectiveness  
446 of magnetic resonance spectroscopy and enhanced magnetic resonance imaging  
447 techniques in aiding the localisation of prostate abnormalities for biopsy: a  
448 systematic review and economic evaluation. *Health Technol Assess* 2013;**17**(20):1-  
449 281.

- 1  
2  
3 450 13. Epstein JI, Walsh PC, Carmichael M, et al. Pathologic and clinical findings to predict  
4 451 tumor extent of nonpalpable (stage t1c) prostate cancer. JAMA 1994;**271**(5):368-74.  
5  
6 452 14. Kuru TH, Roethke MC, Seidenader J, et al. Critical Evaluation of Magnetic Resonance  
7 453 Imaging Targeted, Transrectal Ultrasound Guided Transperineal Fusion Biopsy for  
8 454 Detection of Prostate Cancer. J Urol 2013;**190**(4):1380-6.  
9  
10 455 15. Eichler K, Hempel S, Wilby J, et al. Diagnostic value of systematic biopsy methods in the  
11 456 investigation of prostate cancer: a systematic review. J Urol 2006;**175**(5):1605-12.  
12  
13 457 16. Lecornet E, Ahmed HU, Hu Y, et al. The accuracy of different biopsy strategies for the  
14 458 detection of clinically important prostate cancer: a computer simulation. J Urol  
15 459 2012;**188**(3):974-80.  
16  
17 460 17. Haffner J, Lemaitre L, Puech P, et al. Role of magnetic resonance imaging before initial  
18 461 biopsy: comparison of magnetic resonance imaging-targeted and systematic biopsy  
19 462 for significant prostate cancer detection. BJU Int 2011;**108**(8 Pt 2):E171-8.  
20  
21 463 18. Park BK, Park JW, Park SY, et al. Prospective evaluation of 3-T MRI performed before  
22 464 initial transrectal ultrasound-guided prostate biopsy in patients with high prostate-  
23 465 specific antigen and no previous biopsy. AJR American journal of roentgenology  
24 466 2011;**197**(5):W876-81.  
25  
26 467 19. Kasivisvanathan V, Dufour R, Moore CM, et al. Transperineal Magnetic Resonance Image  
27 468 Targeted Prostate Biopsy Versus Transperineal Template Prostate Biopsy in the  
28 469 Detection of Clinically Significant Prostate Cancer. J Urol 2013 **189**(3):860-6.  
29  
30 470 20. de Rooij M, Hamoen EH, Futterer JJ, et al. Accuracy of multiparametric MRI for prostate  
31 471 cancer detection: a meta-analysis. AJR American journal of roentgenology  
32 472 2014;**202**(2):343-51.  
33  
34 473 21. Pokorny MR, de Rooij M, Duncan E, et al. Prospective Study of Diagnostic Accuracy  
35 474 Comparing Prostate Cancer Detection by Transrectal Ultrasound-Guided Biopsy  
36 475 Versus Magnetic Resonance (MR) Imaging with Subsequent MR-guided Biopsy in  
37 476 Men Without Previous Prostate Biopsies. Eur Urol 2014.  
38  
39 477 22. Siddiqui MM, Rais-Bahrami S, Truong H, et al. Magnetic resonance imaging/ultrasound-  
40 478 fusion biopsy significantly upgrades prostate cancer versus systematic 12-core  
41 479 transrectal ultrasound biopsy. Eur Urol 2013;**64**(5):713-9.  
42  
43 480 23. Wysock JS, Rosenkrantz AB, Huang WC, et al. A Prospective, Blinded Comparison of  
44 481 Magnetic Resonance (MR) Imaging-Ultrasound Fusion and Visual Estimation in the  
45 482 Performance of MR-targeted Prostate Biopsy: The PROFUS Trial. Eur Urol 2013.  
46  
47 483 24. PROstate MRI Imaging Study (PROMIS). Current Controlled Trials Web site.  
48 484 [http://www.controlled-trials.com/](http://www.controlled-trials.com/ISRCTN16082556/16082556)  
49  
50  
51  
52  
53  
54  
55  
56  
57  
58  
59  
60

- 1  
2  
3 486 25. Department of Health. National Schedules of Reference Costs: financial year 2011 to  
4 487 2012. London, 2013.  
5  
6 488 26. de Rooij M, Crienen S, Witjes JA, et al. Cost-effectiveness of Magnetic Resonance (MR)  
7 489 Imaging and MR-guided Targeted Biopsy Versus Systematic Transrectal Ultrasound-  
8 490 Guided Biopsy in Diagnosing Prostate Cancer: A Modelling Study from a Health Care  
9 491 Perspective. *Eur Urol* 2013.  
10  
11 492 27. Willis S, Miners A, van der Meulen J. Re: de Rooij M, et al. Cost-effectiveness of Magnetic  
12 493 Resonance (MR) Imaging and MR-guided Targeted Biopsy Versus Systematic  
13 494 Transrectal Ultrasound-Guided Biopsy in Diagnosing Prostate Cancer: A Modelling  
14 495 Study from a Health Care Perspective. [eLetter]. *European Urology*, April 22 2014.  
15  
16 496 28. Bossuyt PM, Reitsma JB, Bruns DE, et al. The STARD statement for reporting studies of  
17 497 diagnostic accuracy: explanation and elaboration. *Ann Intern Med* 2003;**138**(1):W1-  
18 498 12.  
19  
20 499 29. Moore CM, Kasivisvanathan V, Eggener S, et al. Standards of Reporting for MRI-targeted  
21 500 Biopsy Studies (START) of the Prostate: Recommendations from an International  
22 501 Working Group. *European Urology* 2013;**64**(4):544-52.  
23  
24 502  
25  
26 503  
27  
28  
29  
30  
31  
32  
33  
34  
35  
36  
37  
38  
39  
40  
41  
42  
43  
44  
45  
46  
47  
48  
49  
50  
51  
52  
53  
54  
55  
56  
57  
58  
59  
60

1  
2  
3  
4  
5  
6  
7  
8  
9  
10  
11  
12  
13  
14  
15  
16  
17  
18  
19  
20  
21  
22  
23  
24  
25  
26  
27  
28  
29  
30  
31  
32  
33  
34  
35  
36  
37  
38  
39  
40  
41  
42  
43  
44  
45  
46  
47  
48  
49  
50  
51  
52  
53  
54  
55  
56  
57  
58  
59  
60

504 **Figure 3**  
505 **Structure of the decision tree**

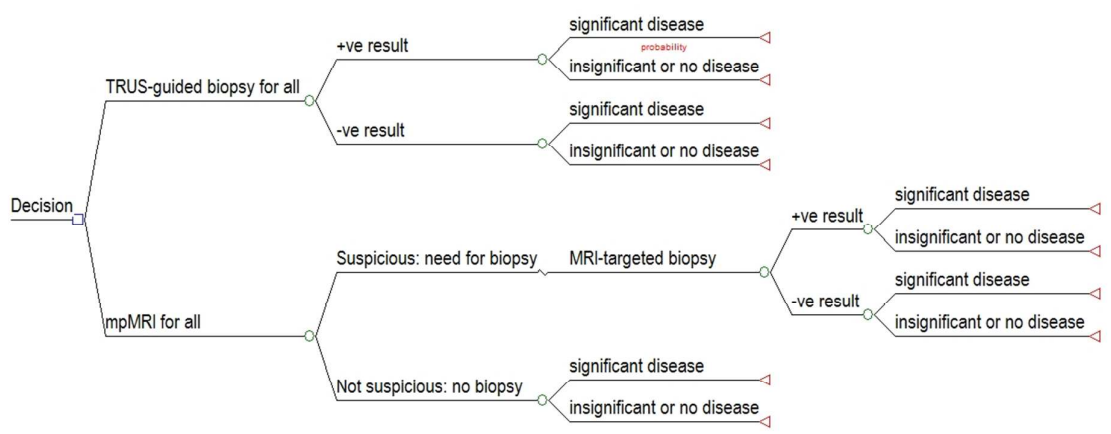

506  
507  
508  
509  
510  
511

Peer review only

512 **Figure 4**

513 One-way sensitivity analysis showing the expected number of patients with wrong  
 514 diagnoses according to the prevalence of clinically significant disease in a cohort of 1000  
 515 men. See text for further explanation.

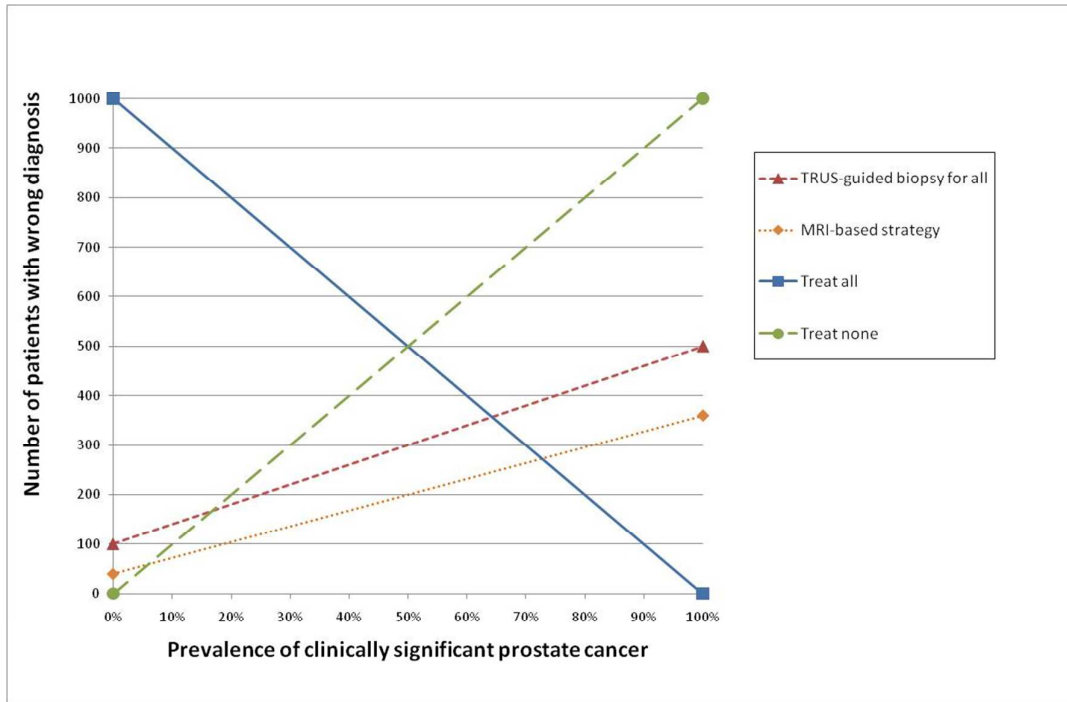

516

517

518

ew only

519 **Table 3**

520 Diagnostic accuracy estimates of TRUS-guided biopsy, mpMRI and MRI-targeted biopsy used  
 521 in the base case analysis

| Index Test          | Sensitivity                                                                  | Specificity                                                                                                                                       | Reference test                                                                                                                                 | Source and patient population                                                                                                                                                                                        |
|---------------------|------------------------------------------------------------------------------|---------------------------------------------------------------------------------------------------------------------------------------------------|------------------------------------------------------------------------------------------------------------------------------------------------|----------------------------------------------------------------------------------------------------------------------------------------------------------------------------------------------------------------------|
| TRUS-guided biopsy  | <b>50%</b><br>(16/34 patients, 95% CIs: 27-73)<br>$\alpha = 25, \beta = 25$  | <b>90%</b><br>(57/62 patients, 95% CIs: 78-97)<br>$\alpha = 45, \beta = 5$                                                                        | Whole-mount pathology                                                                                                                          | Lecornet 2012 <sup>16</sup> : Simulated biopsy results on digitally reconstructed prostates of 96 men who had undergone surgery for bladder cancer which revealed prostate cancer.                                   |
| mpMRI               | <b>80%</b><br>(252/302, 95% CIs: 66-90)<br>$\alpha = 40, \beta = 5$          | <b>60%</b><br>(154/253 patients, 95% CIs: 45-76)<br>$\alpha = 30, \beta = 20$                                                                     | TRUS-guided extended systematic biopsies (10-12 core) plus two targeted biopsies for those with any area suspicious on mpMRI (score $\geq 3$ ) | Haffner 2011 <sup>17</sup> : 555 men with suspected localised prostate defined as raised PSA of >3-4ng/ml and/or abnormal DRE with no clinical or biological suspicion of stage T>3 or mets and had no prior biopsy. |
| MRI-targeted biopsy | <b>80%</b><br>(94/121 patients, 95% CIs: 66-90)<br>$\alpha = 40, \beta = 10$ | <b>90%</b><br><i>Assumed to be equivalent to the specificity of TRUS-guided biopsy,</i> (57/62 patients, 95% CIs: 78-97) $\alpha = 45, \beta = 5$ | 20 sector-TPM                                                                                                                                  | Kasivisvanathan 2013 <sup>19</sup> : 182 men who had a suspicious lesion on mpMRI; 78 of whom were biopsy naive, 32 had a prior negative biopsy and 72 had a prior positive biopsy.                                  |

522

523 *TRUS – transrectal ultrasound, TPM- template mapping biopsy, mpMRI – multi-parametric*524 *magnetic resonance imaging, MRI-TB – MRI-targeted biopsy. Data inputs were rounded to*

1  
2  
3 525 the nearest 5%. Beta distributions were estimated using the integer form in Excel according

4  
5 526 to the parameters  $\alpha$  and  $\beta$ .

6  
7  
8 527  
9  
10  
11  
12  
13  
14  
15  
16  
17  
18  
19  
20  
21  
22  
23  
24  
25  
26  
27  
28  
29  
30  
31  
32  
33  
34  
35  
36  
37  
38  
39  
40  
41  
42  
43  
44  
45  
46  
47  
48  
49  
50  
51  
52  
53  
54  
55  
56  
57  
58  
59  
60

For peer review only

528 **Table 4**529 **Details of calculations and** results of the decision analysis for a cohort of 1000 men

530 comparing TRUS-guided biopsy with mpMRI and MRI-targeted biopsy.

|                                                                                                          | TRUS-guided biopsy                                                                                                                         | mpMRI then MRI-targeted biopsy                                                                                                                                                                                                                                                                                        |
|----------------------------------------------------------------------------------------------------------|--------------------------------------------------------------------------------------------------------------------------------------------|-----------------------------------------------------------------------------------------------------------------------------------------------------------------------------------------------------------------------------------------------------------------------------------------------------------------------|
| No of biopsies                                                                                           | <b>1000</b><br>(all men)                                                                                                                   | <b>600</b><br>$= P(\text{MRI+ D+}) + P(\text{MRI+ D-})$<br>$= (\text{sensMRI} * \text{prev} * \text{no\_in\_cohort}) +$<br>$((1 - \text{specMRI}) * (1 - \text{prev}) * \text{no\_in\_cohort})$<br>$= (0.8 * 0.5 * 1000) + ((1 - 0.6) * (1 - 0.5) * 1000)$                                                            |
| Patients with clinically significant cancer & correctly identified (True Positive)                       | <b>250</b><br>$= P(\text{TRUS+ D+})$<br>$= \text{sensTRUS} * \text{prev} * \text{no\_in\_cohort}$<br>$= 0.5 * 0.5 * 1000$                  | <b>320</b><br>$= P(\text{MRI+ D+}) * P(\text{MRITB+ D+})$<br>$= \text{sensMRI} * \text{sensMRITB} * \text{prev} * \text{no\_in\_cohort}$<br>$= 0.8 * 0.8 * 0.5 * 1000$                                                                                                                                                |
| Patients with clinically significant cancer & wrongly identified (False Negative)                        | <b>250</b><br>$= P(\text{TRUS+ D-})$<br>$= (1 - \text{sensTRUS}) * \text{prev} * \text{no\_in\_cohort}$<br>$= (1 - 0.5) * 0.5 * 1000$      | <b>180</b><br>$= P(\text{MRI- D+}) + P(\text{MRI+ D+}) * P(\text{MRITB- D+})$<br>$= ((1 - \text{sensMRI}) * \text{prev} * \text{no\_in\_cohort}) +$<br>$(\text{sensMRI} * (1 - \text{sensMRITB}) * \text{prev} * \text{no\_in\_cohort})$<br>$= ((1 - 0.8) * 0.5 * 1000) + (0.8 * (1 - 0.8) * 0.5 * 1000)$             |
| Patients with insignificant prostate cancer or no prostate cancer & correctly identified (True Negative) | <b>450</b><br>$= P(\text{TRUS- D-})$<br>$= \text{specTRUS} * (1 - \text{prev}) * \text{no\_in\_cohort}$<br>$= 0.9 * (1 - 0.5) * 1000$      | <b>480</b><br>$= P(\text{MRI- D-}) + P(\text{MRI+ D-}) * P(\text{MRITB- D-})$<br>$= (\text{specMRI} * (1 - \text{prev}) * \text{no\_in\_cohort}) +$<br>$((1 - \text{specMRI}) * \text{specMRITB} * (1 - \text{prev}) * \text{no\_in\_cohort})$<br>$= (0.6 * (1 - 0.5) * 1000) + ((1 - 0.6) * 0.9 * (1 - 0.5) * 1000)$ |
| Patients with insignificant prostate cancer or no prostate cancer & wrongly identified (False Positive)  | <b>50</b><br>$= P(\text{TRUS+ D-})$<br>$= (1 - \text{specTRUS}) * (1 - \text{prev}) * \text{no\_in\_cohort}$<br>$= (1 - 0.9) * 0.5 * 1000$ | <b>20</b><br>$= P(\text{MRI+ D-}) * P(\text{MRITB+ D-})$<br>$= (1 - \text{specMRI}) * (1 - \text{specMRITB}) * (1 - \text{prev}) * \text{no\_in\_cohort}$<br>$= (1 - 0.6) * (1 - 0.9) * (1 - 0.5) * 1000$                                                                                                             |

531

532 '*prev*' – prevalence; '*no\_in\_cohort*' – number of men in cohort; '*sensTRUS*' – sensitivity of TRUS-guided biopsy;533 '*specTRUS*' – specificity of TRUS-guided biopsy; '*sensMRI*' – sensitivity of mpMRI; '*specMRI*' – specificity of534 mpMRI; '*sensMRITB*' – sensitivity of MRI-targeted biopsy; '*specMRITB*' – specificity of MRI-targeted biopsy.



535 **Table 3**

536 Results of sensitivity analyses in a cohort of 1000 men

| Scenario                                                                                                 | Base case analysis |                                | Scenario i:<br>(mpMRI sensitivity 74%, specificity 88%) |                                | Scenario ii:<br>(MRI-targeted biopsy sensitivity 80%, specificity 80%) |                                |
|----------------------------------------------------------------------------------------------------------|--------------------|--------------------------------|---------------------------------------------------------|--------------------------------|------------------------------------------------------------------------|--------------------------------|
| Strategy                                                                                                 | TRUS-guided biopsy | mpMRI then MRI-targeted biopsy | TRUS-guided biopsy                                      | mpMRI then MRI-targeted biopsy | TRUS-guided biopsy                                                     | mpMRI then MRI-targeted biopsy |
| No of biopsies                                                                                           | 1000               | 600                            | 1000                                                    | 430                            | 1000                                                                   | 600                            |
| Patients with clinically significant cancer & correctly identified (True Positive)                       | 250                | 320                            | 250                                                     | 296                            | 250                                                                    | 320                            |
| Patients with clinically significant cancer & wrongly identified (False Negative)                        | 250                | 180                            | 250                                                     | 204                            | 250                                                                    | 180                            |
| Patients with insignificant prostate cancer or no prostate cancer & correctly identified (True Negative) | 450                | 480                            | 450                                                     | 494                            | 450                                                                    | 460                            |
| Patients with insignificant prostate cancer or no prostate cancer & wrongly identified (False Positive)  | 50                 | 20                             | 50                                                      | 6                              | 50                                                                     | 40                             |

537

538

1  
2  
3  
4  
5  
6  
7  
8  
9  
10  
11  
12  
13  
14  
15  
16  
17  
18  
19  
20  
21  
22  
23  
24  
25  
26  
27  
28  
29  
30  
31  
32  
33  
34  
35  
36  
37  
38  
39  
40  
41  
42  
43  
44  
45  
46  
47  
48  
49  
50  
51  
52  
53  
54  
55  
56  
57  
58  
59  
60

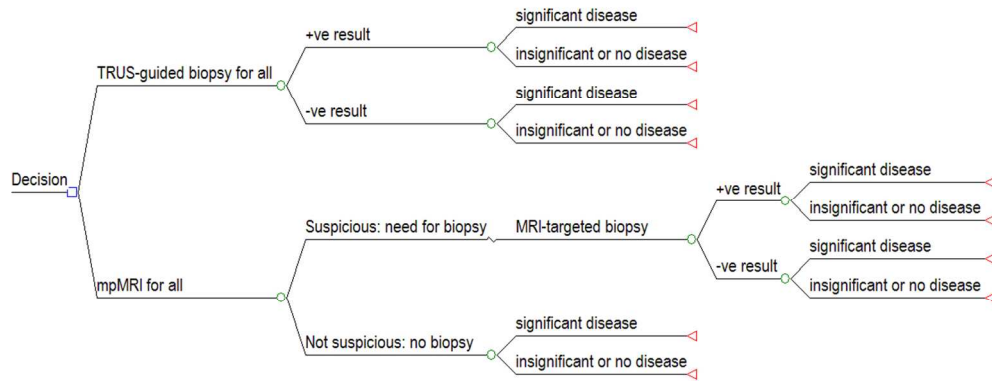

102x41mm (300 x 300 DPI)

Peer review only

1  
2  
3  
4  
5  
6  
7  
8  
9  
10  
11  
12  
13  
14  
15  
16  
17  
18  
19  
20  
21  
22  
23  
24  
25  
26  
27  
28  
29  
30  
31  
32  
33  
34  
35  
36  
37  
38  
39  
40  
41  
42  
43  
44  
45  
46  
47  
48  
49  
50  
51  
52  
53  
54  
55  
56  
57  
58  
59  
60

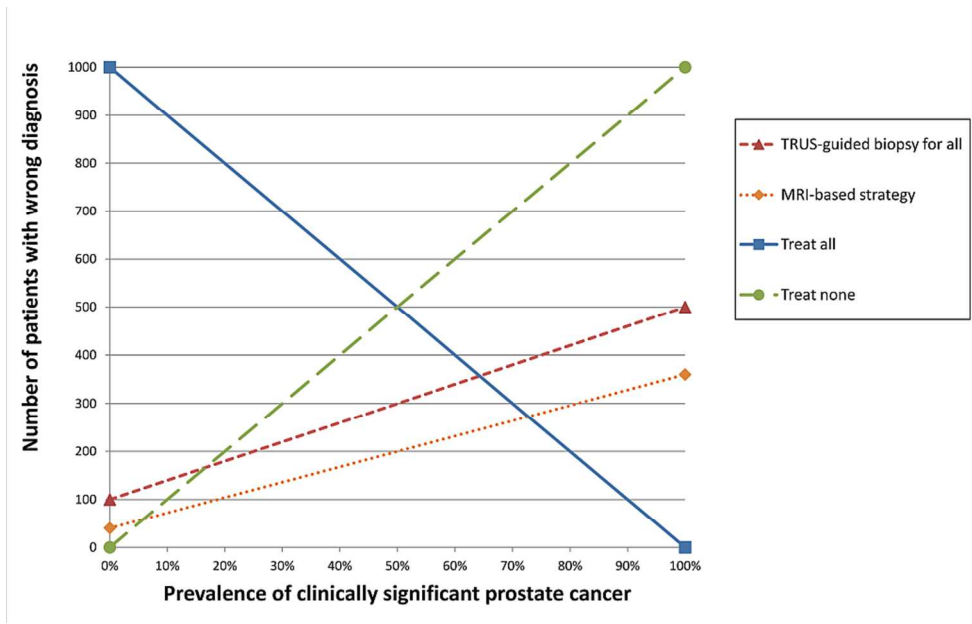

One-way sensitivity analysis showing the expected number of patients with wrong diagnoses according to the prevalence of clinically significant disease in a cohort of 1000 men. See text for further explanation. 90x55mm (300 x 300 DPI)

review only
